1 **Title:** Metabolomic, photoprotective, and photosynthetic acclimatory responses to post-  
2 flowering drought in sorghum.

3  
4 **Authors:** Christopher R. Baker<sup>1\*</sup>, Dhruv Patel<sup>2</sup>, Benjamin J. Cole<sup>3</sup>, Lindsey G. Ching<sup>2</sup>, Oliver  
5 Dautermann<sup>2</sup>, Armen C. Kelikian<sup>2</sup>, Cayci Allison<sup>4</sup>, Julie Pedraza<sup>4</sup>, Julie Sievert<sup>4</sup>, Aivett Bilbao<sup>5</sup>,  
6 Joon-Yong Lee<sup>6</sup>, Young-Mo Kim<sup>6</sup>, Jennifer E. Kyle<sup>6</sup>, Kent J. Bloodsworth<sup>6</sup>, Vanessa Paurus<sup>6</sup>,  
7 Kim K. Hixson<sup>5</sup>, Robert Huttmacher<sup>7</sup>, Jeffery Dahlberg<sup>4</sup>, Peggy G. Lemaux<sup>2</sup>, Krishna K.  
8 Niyogi<sup>1,8</sup>

9  
10 <sup>1</sup>Howard Hughes Medical Institute, Dept. of Plant and Microbial Biology, University of  
11 California, Berkeley, CA 94720-3102, USA

12 <sup>2</sup> Dept. of Plant and Microbial Biology, University of California, Berkeley, CA 94720-3102,  
13 USA

14 <sup>3</sup>DOE-Joint Genome Institute, Lawrence Berkeley National Laboratory, Berkeley, CA 94720,  
15 USA

16 <sup>4</sup>UC-ANR Kearney Agricultural Research and Extension (KARE) Center, Parlier, CA 93648,  
17 USA

18 <sup>5</sup>Environmental Molecular Sciences Laboratory, Pacific Northwest National Laboratory,  
19 Richland, WA 99352, USA

20 <sup>6</sup>Biological Sciences Division, Pacific Northwest National Laboratory, Richland, WA 99352,  
21 USA

22 <sup>7</sup>Department of Plant Sciences, University of California, Davis, CA 95616, USA

23 <sup>8</sup>Molecular Biophysics and Integrated Bioimaging Division, Lawrence Berkeley National  
24 Laboratory, Berkeley, CA 94720, USA

25

26 \*Corresponding author: [cbaker@berkeley.edu](mailto:cbaker@berkeley.edu)

27

28 Emails (in order of authorship): [cbaker@berkeley.edu](mailto:cbaker@berkeley.edu), [dpp47@berkeley.edu](mailto:dpp47@berkeley.edu), [bjcole@lbl.gov](mailto:bjcole@lbl.gov),  
29 [lindseygching@berkeley.edu](mailto:lindseygching@berkeley.edu), [oliver.dautermann@basf.com](mailto:oliver.dautermann@basf.com), [akelikian@berkeley.edu](mailto:akelikian@berkeley.edu),  
30 [cayci.kings@gmail.com](mailto:cayci.kings@gmail.com), [jjpedraza@ucanr.edu](mailto:jjpedraza@ucanr.edu), [aivett.bilbao@pnnl.gov](mailto:aivett.bilbao@pnnl.gov),  
31 [joonyong.lee@pnnl.gov](mailto:joonyong.lee@pnnl.gov), [Young-Mo.Kim@pnnl.gov](mailto:Young-Mo.Kim@pnnl.gov), [Jennifer.Kyle@pnnl.gov](mailto:Jennifer.Kyle@pnnl.gov),  
32 [Kent.Bloodsworth@pnnl.gov](mailto:Kent.Bloodsworth@pnnl.gov), [vanessa.paurus@pnnl.gov](mailto:vanessa.paurus@pnnl.gov), [Kim.Hixson@pnnl.gov](mailto:Kim.Hixson@pnnl.gov),  
33 [rbhuttmacher@ucdavis.edu](mailto:rbhuttmacher@ucdavis.edu), [drjeffdahlberg@gmail.com](mailto:drjeffdahlberg@gmail.com), [lemauxpg@berkeley.edu](mailto:lemauxpg@berkeley.edu),  
34 [niyogi@berkeley.edu](mailto:niyogi@berkeley.edu)

35

36 Date of submission: 1/03/22

37

38 Main text figures and tables: Six figures, one table.

39 Supplemental figures and tables: Five figures, two tables

40 Word count (introduction, results/discussion through acknowledgements): 4,225 words

41 Supporting information: Supplementary methods

42

43 **Running title:** Maintaining photosynthesis in long drought

44

45 **Highlight:**

46 Pathways contributing to the long-term maintenance of photosynthetic activity in  
47 terminal post-flowering drought are revealed by a comprehensive approach combining in-field  
48 photosynthetic physiological analysis, metabolomics, and transcriptomics.

49  
50 **Abstract:**

51  
52 Climate change is globally affecting rainfall patterns, necessitating the improvement of  
53 drought tolerance in crops. *Sorghum bicolor* is a drought-tolerant cereal capable of producing  
54 high yields under water scarcity conditions. Functional stay-green sorghum genotypes can  
55 maintain green leaf area and efficient grain filling in terminal post-flowering water deprivation, a  
56 period of ~10 weeks. To obtain molecular insights into these characteristics, two drought-tolerant  
57 genotypes, BTx642 and RTx430, were grown in control and terminal post-flowering drought  
58 field plots in the Central Valley of California. Photosynthetic, photoprotective, water dynamics,  
59 and biomass traits were quantified and correlated with metabolomic data collected from leaves,  
60 stems, and roots at multiple timepoints during drought. Physiological and metabolomic data was  
61 then compared to longitudinal RNA sequencing data collected from these two genotypes. The  
62 metabolic response to drought highlights the uniqueness of the post-flowering drought  
63 acclimation relative to pre-flowering drought. The functional stay-green genotype BTx642  
64 specifically induced photoprotective responses in post-flowering drought supporting a putative  
65 role for photoprotection in the molecular basis of the functional stay-green trait. Specific genes  
66 are highlighted that may contribute to post-flowering drought tolerance and that can be targeted  
67 in crops to maximize yields under limited water input conditions.

68  
69 **Keywords:** *Sorghum bicolor*, photosynthesis, drought tolerance, photoprotection, metabolomics,  
70 antioxidants, stomatal closure, stay-green

71  
72 **Abbreviations:** WUE<sub>i</sub>– Intrinsic water-use efficiency; ROS– Reactive oxygen species; NPQ–  
73 Non-photochemical quenching; DAP– Days after planting; F<sub>v</sub>/F<sub>m</sub>– Dark-acclimated maximum  
74 quantum efficiency of PSII; P<sub>n</sub>– Net assimilation of CO<sub>2</sub> in the light; g<sub>s</sub>– Stomatal conductance;  
75 ΦPSII– Operating efficiency of PSII in the light; SPE-IMS-MS– Ion mobility spectrometry and  
76 mass spectrometry; ABA– Abscisic acid; TAG– Triacylglycerides; R<sub>d</sub>–Respiration in the dark.

77 **Main text**

78

79 **Introduction:**

80

81 Worldwide, drought remains the primary abiotic cause of agricultural yield loss, and  
82 climate change may accelerate the impact of drought on agriculture as the frequency and severity  
83 of droughts increase (Lesk *et al.*, 2016). The overuse of groundwater, largely driven by agricultural  
84 demand (Giordano, 2009; Giordano *et al.*, 2019), also limits irrigation as a long-term solution to  
85 maintaining agricultural productivity in a world experiencing hotter temperatures (Lobell *et al.*,  
86 2014; Ort and Long, 2014). Defining and tweaking the molecular mechanisms underlying drought-  
87 adapted traits in plants is vital to maintaining high yields under expected future climatic conditions  
88 (Varshney *et al.*, 2018).

89 Drought tolerance is a complex, quantitative trait dependent on plant developmental stage  
90 and the severity of the water deficit (Luo *et al.*, 2019). Crops, like sorghum, that perform C4  
91 photosynthesis, an evolutionary innovation in the carbon (C) reactions of photosynthesis and  
92 anatomy of the leaf tissue that increases intrinsic water use-efficiency (WUE<sub>i</sub>) by reducing  
93 transpirational loss, can exhibit higher drought tolerance than those using C3 photosynthesis. Of  
94 the C4 crops, sorghum [*Sorghum bicolor* (L.) Moench] is exceptionally drought-tolerant (Kimber,  
95 2000), and the timing of drought before anthesis (pre-flowering drought) or post-anthesis (post-  
96 flowering drought) has markedly different outcomes (Rosenow and Clark 1995; Rosenow *et al.*  
97 1996; Varoquaux *et al.* 2019). In the case of post-flowering drought stress, stalk-lodging rates and  
98 leaf senescence can increase and, of agronomic importance, grain size and grain yield can be  
99 decreased (Thomas and Howarth, 2000).

100 Notably, the extent of post-flowering drought tolerance also differs between sorghum  
101 genotypes with so-called “stay-green” genotypes able to delay the senescence of the upper canopy  
102 until after the final stages of grain filling (Krieg and Hutmacher, 1986; Borrell *et al.*, 2000). In  
103 “functional stay-green” plants, such as the sorghum genotype BTx642, delayed leaf senescence in  
104 terminal post-anthesis water deprivation is part of a suite of advantageous traits contributing to  
105 maintenance of high grain yields and grain size and prevention of stalk lodging (Tuinstra *et al.*,  
106 1997; Thomas and Howarth, 2000; Harris *et al.*, 2007). This is contrasted with so-called “cosmetic  
107 stay-green” plants, which block chlorophyll degradation and, thus, remain green in drought but do  
108 not maintain high yields (Thomas and Howarth, 2000; Hörtensteiner and Kräutler, 2011).

109           At the whole-plant level, BTx642 has low tillering rates and less above-ground biomass  
110 per plant relative to post-flowering drought-susceptible sorghum genotypes at anthesis (Borrell *et*  
111 *al.*, 2014*b,a*). At the cellular level, stay-green sorghum genotypes maintain photosynthetic  
112 machinery through the grain-filling period in post-flowering drought (Borrell *et al.*, 2001;  
113 Varoquaux *et al.*, 2019), which may contribute to efficient grain filling and to preventing stalk  
114 lodging by maintaining high sugar levels in the stalk (Rosenow and Clark, 1995; Sanchez *et al.*,  
115 2002). Further, maintenance of photosynthetic leaf area during post-flowering drought will only  
116 be beneficial to the genotype if sufficient water reserves are available to allow stomata to remain  
117 partly open for CO<sub>2</sub> assimilation (Borrell *et al.*, 2001; Kamal *et al.*, 2019; Varoquaux *et al.*, 2019).

118           Leaf senescence is a developmentally controlled response that is responsive to abiotic  
119 stress signals. In particular, elevated reactive oxygen species (ROS) levels can induce early leaf  
120 senescence in drought (Cruz de Carvalho, 2008; Noctor *et al.*, 2014). Excess excitation energy in  
121 drought drives ROS production leading to the peroxidation of polyunsaturated lipids, damage to  
122 proteins, and the inactivation of pigments and antioxidants. Plants have evolved a suite of  
123 photoprotective responses to manage ROS (Li *et al.*, 2009). These include photoprotective  
124 antioxidants in photosynthetic and epidermal tissues, such as ascorbate, tocopherols, and  
125 photoprotective flavonoids (Logan *et al.*, 2006; Li *et al.*, 2009; Agati and Tattini, 2010), as well  
126 as activation of non-photochemical quenching (NPQ), the controlled dissipation of excess  
127 excitation energy as heat (Cousins *et al.*, 2002; Golding and Johnson, 2003; Jung, 2004; Ogbaga  
128 *et al.*, 2014; Lima Neto *et al.*, 2017). Thus, strong photoprotective responses may act as a key post-  
129 flowering drought tolerance trait, however, direct evidence is lacking for this hypothesis.

130           The molecular response of sorghum to post-flowering drought in the field has not been  
131 extensively characterized. In a recent study, the time-resolved transcriptomic response was  
132 determined for pre-flowering and post-flowering droughted field-grown sorghum genotypes  
133 BTx642 and RTx430 (Varoquaux *et al.*, 2019). Paralleling this study, two drought-tolerant  
134 sorghum genotypes, BTx642 and RTx430, were grown in irrigated plots in the California Central  
135 Valley in 2019 under both control and post-flowering drought conditions. BTx642 was selected as  
136 a functional stay-green variety, whereas RTx430 has strong drought tolerance but lacks the full  
137 suite of stay-green traits (Crasta *et al.* 1999). The aim of this study was to: (1) identify shared  
138 changes in metabolite and lipid levels in leaves, stems, and roots in response to post-flowering  
139 drought, (2) measure the extent of drought-induced stomatal closure in the two genotypes and

140 identify stomatal closure regulators linked to this response, and (3) determine whether post-  
141 flowering drought-induced photoprotective responses, particularly in the stay-green genotype  
142 BTx642, contribute to the maintenance of green leaf area in a stay-green genotype under field  
143 conditions. To this end, photosynthetic, photoprotective, and water dynamics traits under the two  
144 field growth conditions were quantified in both genotypes across multiple drought timepoints and  
145 samples were harvested for metabolomic and lipidomic analysis. Physiological and metabolomic  
146 datasets were then compared to transcriptomic data collected from the same genotypes under  
147 identical growth conditions in a prior year (Varoquaux *et al.*, 2019) in order to identify specific  
148 candidate genes that may contribute to post-flowering drought tolerance in sorghum. In particular,  
149 candidate genes are identified that may contribute to the stronger photoprotective responses and  
150 the control of stomatal closure during drought, as discovered in this work.

## 151 152 **Materials and Methods**

### 153 154 *Field growth conditions*

155  
156 Sorghum genotypes BTx642 and RTx430 were grown in Parlier, CA (36.6008°N,  
157 119.5109°W) in 2019 in a Hanford sandy loam soil (pH = 7.37) with a silky substratum in 0.071  
158 hectares (ha) plots of ten rows each. Two watering conditions were used on plots: I) control,  
159 consisting of weekly watering five days prior to sampling dates, with the first irrigation starting  
160 18 days after planting (DAP) and continuing until 123 DAP and II) post-flowering drought,  
161 consisting of regular irrigation up through and including irrigation before 65 DAP– at which point  
162 over 50% of the plants flowered – with terminal water deprivation from that point onwards (Figure  
163 1B). Pre-planting irrigation was performed for all plots such that the upper 122 cm of soil would  
164 have been refilled to soil field capacity. Plots receiving water were irrigated at seven-day intervals  
165 using drip irrigation lines placed on the soil surface of each furrow. All irrigated plots received  
166 equal volumes of water equal to 100% of the average weekly calculated crop evapotranspiration  
167 for the 7-day period before irrigation. Irrigation once per week in plots replicates sorghum farming  
168 irrigation practices in the Western United States. Additionally, providing equal water volume to  
169 all irrigated plots prevents a scenario where genotypic differences in evapotranspiration rates lead  
170 to a difference in total water volume supplied to specific plots. Total final biomass was comparable  
171 between control plots for both genotypes with an average forage (65% moisture) of 13.02 T ac<sup>-1</sup>

172 for BTx642 and 13.28 T ac<sup>-1</sup> for RTx430. For greater details on crop evapotranspiration and  
173 irrigation management, see supplemental materials and Xu et al. (Xu *et al.*, 2018).

174 Planting in 2019 occurred on June 10. Four sampling dates were selected and for each date,  
175 control plots had not received water for 5 days: 1) August 20, 2019 (D1), five days since last  
176 watering for all plots, 70 DAP, II) August 27, 2019 (D2), 12 days of post-flowering drought, 77  
177 DAP, 3) September 10, 2019 (D3), 26 days of post-flowering drought, 91 DAP, 4) September 24,  
178 2019 (D4), 40 days of post-flowering drought plots, 105 DAP.

179

#### 180 *Harvest data*

181

182 Harvest data metrics of 50% flowering time, plant height, 1000 seed weight, seed weight  
183 (13% moisture) ha<sup>-1</sup>, and forage (65% moisture) weight ha<sup>-1</sup> were determined for each plot as  
184 previously described (Xu *et al.*, 2018). Three replicate plots were planted for each genotype under  
185 the same treatment regimes.

186

#### 187 *Leaf phenotypic traits*

188

189 On each of the four 2019 sampling dates, gas exchange and chlorophyll fluorescence  
190 measurements were collected within two time windows: 9:30 to 11:00 (morning) and 14:00 to  
191 16:00 (mid-afternoon) using LI-COR 6400XT instruments (LI-COR, Lincoln, NE, USA). Given  
192 that these sampling dates all occurred post-anthesis, all leaves had emerged and thus, it was  
193 possible to randomly sample the uppermost three leaves including the flag leaf from plants  
194 growing in the interior of each plot at each sampling date. Each of the LI-COR 6400XT  
195 instruments were factory calibrated the month prior to this field work, and the calibrations and  
196 instrument checks as described in Chapter 4 of the LI-COR 6400 manual were performed on each  
197 sampling date. Leaves were maintained near ambient light levels and temperatures by measuring  
198 ambient PAR levels and local temperatures and re-adjusting actinic light levels and blocking  
199 temperature prior to each set of measurements. The ratio of blue-to-red LED contribution to the  
200 cuvette light source was 10% / 90%. Relative humidity in the measurement cuvette was maintained  
201 between 50% to 60% to maintain stomatal aperture width. Flow rate was set to 400  $\mu\text{mol s}^{-1}$  and  
202 sample [CO<sub>2</sub>] to 400  $\mu\text{mol mol}^{-1}$ . Stability variables typically converged within 60 s of clamping

203 a leaf, then an infrared gas analyzer match was performed and, once stability variables were  
204 restored following the match, the measurement was taken. Leaves were clamped to avoid the  
205 midrib and always near the midpoint of the leaf (*i.e.*, equal distance from the tip and leaf base). A  
206 multiphase flash routine was used to estimate chlorophyll fluorescence parameters (Loriaux *et al.*,  
207 2013). Prior to the measurement of  $F_o'$ , fluorescence level of a light acclimated sample when all  
208 PSII reaction centers are open, a far-red light pulse was given to leaves of  $25 \mu\text{mol photons m}^{-2} \text{ s}^{-1}$   
209  $^1$  for 1 s prior to actinic light switching and then lasting an additional 5 s and ending 1 s prior to  
210 the measurement. A minimum of eight leaves were randomly sampled per plot per timepoint.

211 Leaf water potential ( $\psi_l$ ) and osmotic potential ( $\psi_s$ ) were measured on the uppermost non-  
212 flag leaf of the main culm from three randomly selected plants from the interior of each plot in  
213 mid-afternoon the day after D4 (on September 24, 2019, 105 DAP). Thus, the control plots had  
214 not received water for six days and post-flowering droughted plots had not received water for 41  
215 days. On this same day (105 DAP), green leaf area images were collected and  $F_v/F_m$  and NPQ were  
216 determined. Specific to NPQ measurements, these values were measured exclusively on leaves  
217 without visible signs of leaf senescence in both control and droughted plots. This decision was  
218 made to ensure that photoprotective traits could be accurately quantified in leaves with  
219 photosynthetic machinery intact prior to the onset of leaf senescence traits. Green leaf area was  
220 determined by imaging the three uppermost leaves including the flag leaf on ten randomly selected  
221 plants per plot. Stomatal density and guard cell length were quantified using leaf peels collected  
222 on the D4 sampling date from the abaxial leaf surface of the uppermost non-flag leaf of the main  
223 culm from (Lopez *et al.*, 2017). More details of leaf phenotypic measurements can be found in the  
224 supplemental materials.

225

### 226 *Sample collection and processing*

227

228 Within each plot, samples of leaves, stems, and roots from individual plants were manually  
229 collected on the same day of the week and time of the day for each sampling date. Three plants  
230 from each plot were collected and the uppermost three leaves, stems (below the peduncle and  
231 above the node for the next leaf below), and roots were harvested to create a single leaf, stem, and  
232 root sample for each plot for each timepoint. Individual sorghum plants were harvested at various  
233 developmental stages using a shovel to a depth of approximately 30 cm. All samples were then

234 flash-frozen in liquid nitrogen within 5 minutes of being removed from the field. Root tissue was  
235 collected as previously described (Xu *et al.*, 2018). Each week, all samples were collected less  
236 than 1 hr after dawn (dawn), within 1 hr of the midpoint of the light period (midday), and less than  
237 1 hr before dusk (dusk).

238

### 239 *Metabolite extraction, quantification, and metabolomics*

240

241 For details of metabolite extractions and spectrophotometric quantification of specific  
242 metabolites see supplemental materials. Leaf tissue samples from sampling dates D2, D3, and D4  
243 were analyzed by GC-MS, lipidomics, and SPE-IMS-MS. Metabolomic data were collected for  
244 stem and root samples from D2, D3, and D4 sampling dates exclusively by IMS. For GC-MS,  
245 MPLEx extraction was applied to the samples which were weighed at 1 g (Nakayasu *et al.*, 2016).  
246 Then, samples were completely dried under a speed vacuum concentrator. Dried metabolites were  
247 chemically derivatized and analyzed as reported previously (Kim *et al.*, 2015) and further  
248 described in supplemental materials. Metabolites were initially identified by matching  
249 experimental spectra to an augmented version of the Agilent Fiehn Metabolomics Library,  
250 containing spectra and validated retention indices for almost 1000 metabolites (Kind *et al.*, 2009)  
251 and additionally cross-checked by matching with NIST17 GC/MS Spectral Library and Wiley  
252 Registry 11th edition. All metabolite identifications were manually validated to minimize  
253 deconvolution and identification errors during the automated data processing. Data were log<sub>2</sub>  
254 transformed and then mean-centered across the log<sub>2</sub> distribution. C and N values were determined  
255 at the Center for Stable Isotope Biogeochemistry at UC-Berkeley using leaf samples from the D4  
256 time point. Organic nitrogen ( $N_{org}$ ) values were calculated by subtracting total N levels by  
257 spectrophotometrically determined ammonium (Ammonia assay kit, Megazyme, Bray, Ireland)  
258 and nitrate levels (Bloom *et al.*, 2014).

259 For lipidomics, total lipid extracts (TLEs) were analyzed as outlined in Kyle *et al.* (2017)  
260 and further detailed in the supplemental materials. TLEs were analyzed in both positive and  
261 negative electrospray ionization modes, and lipids were fragmented using alternating higher-  
262 energy collision dissociation (HCD) and collision-induced dissociation (CID) (Kyle *et al.*, 2017).  
263 Identifications were made using LIQUID (Kyle *et al.*, 2017) and manually validated by examining  
264 the MS/MS spectra for fragment ions characteristic of the classes and acyl chain compositions of



265 the identified lipids. In addition, the precursor ion isotopic profile extracted ion chromatogram,  
266 and mass measurement error along with the elution time were evaluated. All LC-MS/MS data  
267 were aligned and gap-filled to this target library for feature identification using MZmine 2 (Pluskal  
268 *et al.*, 2010), based on the identified lipid name, observed  $m/z$ , and retention time. Data from each  
269 ionization mode were aligned and gap-filled separately. Aligned features were manually verified  
270 and peak apex intensity values were exported for statistical analysis.

271 For SPE-IMS-MS Metabolomics, extracts were analyzed using a RapidFire 365 (Zhang *et*  
272 *al.*, 2016) coupled with an Agilent 6560 Ion Mobility QTOF MS system (Agilent Technologies,  
273 Santa Clara, CA, USA) and described in detail in the supplemental materials. The PNNL-  
274 PreProcessor v2020.07.24 (<https://omics.pnl.gov/software/pnnl-preprocessor>) was used to  
275 generate new raw MS files (Agilent MassHunter “.d”) for each sample, run with all frames (ion  
276 mobility separations) summed into a single frame and applying 3-points smoothing in the ion  
277 mobility dimension and noise filtering with a minimum intensity threshold of 20 counts. Details  
278 of the data processing and compound identification can be found in supplemental materials.

279

### 280 *Statistical analysis*

281

282 All statistical analyses, excepting metabolomics and lipidomics data, were performed using  
283 JMP Pro 16 software (JMP, Cary, NC, USA). Prior to the analysis of gas exchange values, six  
284 measurements (out of the 462 measurements taken) with physiologically impossible  $C_i$  values were  
285 removed from our datasets and attributed to either machine or user error. Metaboanalyst 5.0  
286 (Chong *et al.*, 2018) was used to guide the selection of metabolites to further analyze using a  
287 significance threshold of  $p < 0.01$  for the significance of the differential abundance of drought vs.  
288 control on at least one sampling date. Ontology enrichment for differentially abundant lipids across  
289 comparisons was performed using Lipid Mini-On (Clair *et al.*, 2019).

290

### 291 *Transcriptomic data processing and visualization*

292

293 To generate expression plots for selected gene sets, we obtained normalized counts of *S.*  
294 *bicolor* genes mapped to a common reference (*S. bicolor* BTx623), and accompanying metadata  
295 from the EPICON field trial described previously (Varoquaux *et al.*, 2019). Normalized counts

296 were then summarized for control-treated leaf samples for each genotype, week, and gene by  
297 taking the arithmetic mean ( $n = 1-3$ ), and  $\text{Log}_2$ -transformation (with a pseudocount of 1). These  
298 values were subtracted from  $\text{Log}_2$ -transformed (plus a pseudocount of 1) normalized counts for  
299 each locus, genotype, day, and treatment from the EPICON dataset, to generate a control mean-  
300 corrected dataset of gene expression for pre- and post-flowering drought treatments. These values  
301 were then plotted as points, with loess-smoothed values computed from these transformed data  
302 plotted as lines.

### 303 **Combined results and discussion**

304

#### 305 *Induction of post-flowering drought response in the field*

306

307 BTx642 and RTx430 plants reached 50% inflorescence emergence by 69 days after  
308 planting (DAP) and 71 DAP, respectively (Fig. 1, Table 1; see Fig. S1 for details of the field  
309 layout). Before anthesis, the average maximum daily temperature was 35.5°C with a range from  
310 29.4°C to 40.0°C for maximum daily temperatures (Fig. 1A). Post-anthesis temperatures declined  
311 moderately with an average maximum daily temperature of 34.6°C with a range of 26.7°C to  
312 40.6°C for maximum daily temperatures throughout the grain-filling period. Relative humidity  
313 was in general low with an average minimum daily value of 23.9% with a range of 13% to 35%  
314 from the time of germination to the end of the grain filling period (Fig. 1A). No precipitation  
315 occurred during the growth lifecycle (Fig. 1A).

316 Prior to 65 DAP, control and post-flowering drought plots for both genotypes received an  
317 equal volume of water once per week, matched to average evapotranspiration rates across the entire  
318 field (Fig. 1B-C, see Methods & Materials). After 65 DAP, post-flowering drought (hereafter,  
319 “drought”) plots were terminally water deprived (Fig. 1B-C). From the 30 cm to 60 cm depth,  
320 plant-available water was 90% depleted by 92 DAP (27 days without water) in droughted plots.  
321 From 90 cm to 120 cm depth, water depletion plateaued at ~75% at 105 DAP (40 days without  
322 water). Water-deficit stress in droughted plots decreased leaf water and osmotic potentials in both  
323 genotypes (Figure 1D-E, Table 1).

324 Consistent with the strong drought tolerance of these genotypes, grain yields, seed weights,  
325 and forage yields were not significantly decreased in droughted plots in either genotype relative to  
326 control (Table 1). Green leaf area significantly declined in both genotypes in droughted plots, but  
327 the decline was smaller in the BTx642 genotype relative to RTx430, consistent with the stay-green

328 phenotype of BTx642 (Table 1). Also reflecting its stay-green phenotype, BTx642 extracted more  
329 soil water in post-flowering drought plots relative to RTx430 (Table S1). Leaf C/N increased in  
330 drought in both genotypes driven primarily by decreased organic N ( $N_{\text{org}}$ ) content (Table 1). The  
331 post-flowering drought response has been described as a competition between maintaining leaf N  
332 content and the N demand of developing seeds (Borrell *et al.*, 2001). In this context, although  $N_{\text{org}}$   
333 levels were reduced by drought,  $N_{\text{org}}$  remained at ~78% of the level of control plants at D4 (40  
334 days without water), highlighting the extent of post-flowering drought tolerance of these genotypes  
335 (Table 1).

336

### 337 *Drought depression of mid-afternoon photosynthesis and stomatal opening*

338

339 Four sampling dates were selected that span the entirety of the water depletion time-course  
340 (sampling dates D1-D4, Fig. 1A-C) to model the photosynthetic and metabolic behavior of  
341 sorghum during drought in greater detail. The morning measurements [(collected between 9:30 to  
342 11:00) for net photosynthetic rates ( $P_n$ ), stomatal conductance ( $g_s$ ), and operating efficiency of  
343 PSII in the light ( $\Phi\text{PSII}$ ) revealed few statistically significant differences between control and  
344 droughted plots (Fig. 2A-C). Two exceptions were a significant difference in  $g_s$  between control  
345 and drought in BTx642 and between control and drought in  $\Phi\text{PSII}$  in RTx430 at D4 (105 DAP, 40  
346 days without water, Fig. 2B-C). However, the extent to which photosynthetic rates early in the day  
347 were unaffected by prolonged water deprivation helps to explain the maintenance of high grain  
348 filling rates in post-flowering drought tolerant sorghum.

349 In contrast to morning measurements, drought repressed  $P_n$ ,  $g_s$ , and  $\Phi\text{PSII}$  in both  
350 genotypes in mid-afternoon measurements (collected between 14:00 to 16:00) at D2 (77 DAP, 12  
351 days without water), D3 (91 DAP, 26 days without water), and D4 (Fig. 2D-F).  $P_n$  and  $g_s$  in  
352 droughted plots in the morning measurements were either higher or equal to mid-afternoon  
353 measurements despite the higher photon flux density in the mid-afternoon at D2, D3, and D4 (Fig.  
354 2A,D, see Table S2 for air temperatures and light levels on sampling dates). This afternoon  
355 depression may also act as a drought acclimation strategy to buffer photosynthetic efficiency upon  
356 water limitation (Epron *et al.*, 1992; Yin *et al.*, 2006).

357 In control plots, mid-afternoon  $P_n$  and  $g_s$  was higher at all timepoints in RTx430 relative to  
358 BTx642 (Fig. 2A,D). Phenotypic comparisons between genotypes grown in separate plots can be  
359 made because (a) the total biomass (i.e.– forage at 65% moisture, Table 1) was nearly equivalent

360 between genotypes in control plots, (b) both genotypes received the same amount of water (see  
361 Materials and Methods), and (c) the comparison between these genotypes grown under equivalent  
362 conditions has been made in other published works (Xu *et al.*, 2018; Gao *et al.*, 2019; Varoquaux  
363 *et al.*, 2019). That BTx642 maintained more closed stomata in control plots agrees with the lower  
364 rates of soil water extraction in BTx642 in irrigated plots relative to RTx430 (Table S2). Thus,  
365 well both RTx430 and BTx642 can be considered drought tolerant genotypes given their yield  
366 data, their drought tolerance strategies diverge somewhat (Table 1, Fig. 2). BTx642 maintained a  
367 constitutively water conservative growth strategy, whereas RTx430 only induced this response in  
368 drought. This is also an example of how high photosynthetic rates under well-watered conditions  
369 is not predictive of higher photosynthetic rates in drought conditions in the absence of other  
370 beneficial traits (Harris *et al.*, 2007; Blum, 2009).

371  $P_n$  and  $g_s$  were correlated for all mid-afternoon measurements in both genotypes (Fig. 2G).  
372 Along with stomatal closure, photoinhibition can contribute to the depression of  $P_n$  in moderate  
373 and severe drought. Dark-acclimated maximum quantum efficiency of PSII ( $F_v/F_m$ ) was not  
374 significantly depressed in droughted plants until D4 in the stay-green genotype BTx642 and not  
375 until D3 in RTx430 (Fig. 2H). Thus, stomatal closure appears to have been the primary cause of  
376 drought-induced depression of total daily photosynthetic rates prior to D4 (40 days without water)  
377 in the stay-green genotype BTx642 and D3 (26 days without water) in RTx430 (Fig. 2A,D,G-H).  
378 Later in the drought period, photoinhibition and loss of green leaf area in the upper canopy also  
379 contributed to the depression of total daily photosynthetic rates, particularly in RTx430 (Table 1,  
380 Fig. 2H). In fact, the drought-induced decline in  $F_v/F_m$  provides a likely explanation for the  
381 depression of intrinsic water-use efficiency ( $WUE_i$ ) specifically in droughted RTx430 in mid-  
382 afternoon measurements (Fig. S2).

383 A somewhat unexpected observation was that BTx642 and RTx430 droughted plants had  
384 small, but significantly increased stomatal density and decreased guard cell length on the abaxial  
385 surface of their upper canopy leaves (Table 1). Given that drought was imposed post-anthesis,  
386 differences in stomatal density and morphology cannot be explained by the emergence of new  
387 leaves with substantial drought-induced developmental changes. However, the absence of a  
388 difference in stomatal index (i.e. stomatal density normalized by epidermal cell density) between  
389 droughted and control samples suggests that increased stomatal density and reduced guard cell

390 length can be attributed to a reduction in epidermal cell size and the shorter total length of the  
391 upper canopy leaves in drought conditions (Clifton-Brown *et al.*, 2002).

392 Drought also depressed the diurnal turnover of transitory photosynthate reserves in leaf  
393 tissue (Fig. 3). Starch levels in leaves at dawn were significantly reduced relative to levels at the  
394 prior dusk timepoint in both genotypes in control plots at D2, D3, and D4 (Fig. 3A). In contrast,  
395 the difference in starch levels between dusk and dawn timepoints was attenuated in droughted plots  
396 and fell below the threshold of significance except for BTx642 at D4. A similar trend was present  
397 in the leaf sugar content (measured as the sum of leaf sucrose, glucose, and fructose, Fig. 3B).  
398 Dawn levels of leaf sugars were significantly lower than dusk at D3 and D4 in both genotypes in  
399 control plots and the difference between dusk and dawn levels for total leaf sugars in droughted  
400 plots was attenuated and not statistically significant. Dark respiration ( $R_d$ ) was repressed in both  
401 genotypes in drought, providing an explanation for the reduced rate of turnover in transitory  
402 photosynthate reserves (Fig. 3C). Yet, the inhibition of diurnal turnover of photosynthate reserves  
403 did not impact the final yields, showing that these plants are able to retune their allocation of  
404 photosynthate in a manner that does not disrupt grain filling (Table 1). In this light, the inhibition  
405 of  $R_d$  in droughted plants can represent one means of limiting carbon loss in conditions of restricted  
406 photosynthate production (Fig. 2D, 3C) (Ayub *et al.*, 2011).

407

#### 408 *Metabolomic responses to post-flowering drought*

409 Several metabolites linked to pre-flowering drought responses were unresponsive to  
410 drought at even the D4 timepoint (40 days of terminal water deprivation). For instance, levels of  
411 the drought-responsive hormone abscisic acid (ABA) were not significantly induced in droughted  
412 plots except in roots of RTx430 at D2 (Fig. 4A). This suggests that induction of ABA across an  
413 entire tissue type, such as roots or leaves, does not factor heavily into the post-flowering drought  
414 response in sorghum (Tuberosa *et al.*, 1994). Further, ABA is thought to induce biosynthesis of  
415 the key osmoprotectant proline in drought and fittingly, proline was not induced by drought in  
416 either genotype under these conditions (Fig. 4A) (Ogbaga *et al.*, 2014) (Cao *et al.*, 2020). These  
417 results highlight the uniqueness of the post-flowering drought metabolic response relative to pre-  
418 flowering drought responses in sorghum.

419 The two genotypes did induce molecules that can act as osmoprotectants in leaf tissue,  
420 albeit different sets of osmoprotectants. Glucose, fructose, and *myo*-inositol were induced in

421 BTx642, whereas RTx430 induced galactose and to a lesser extent fructose as well (Fig. 4A).  
422 The induction of leaf osmoprotectants is consistent with the increase in osmotic potential  
423 measured at D4 (Figure 1E, Table 1). In contrast to the genotype-specific response of leaf tissue,  
424 the osmoprotectant response in root tissue in both genotypes included the shared induction of  
425 raffinose, fructose, mannose, and glycine betaine (Fig. 4A).

426 Levels of the organic acids fumarate and its isomer maleate also increased in droughted  
427 leaf tissue in both genotypes, whereas  $\alpha$ -ketoglutarate levels decreased (Fig. 4A). Fumarate  
428 levels have been negatively correlated with stomatal aperture and are suspected to act as a signal  
429 contributing to the regulation of  $g_s$  in drought (Araújo *et al.*, 2011). The findings here would  
430 provide the first indication of a potential role for elevated fumarate levels in signaling drought-  
431 induced  $g_s$  depression in field-droughted plants (Fig. 2). Decreased  $\alpha$ -ketoglutarate levels in both  
432 genotypes could be linked to reduced  $N_{org}$  levels in droughted plants, as  $\alpha$ -ketoglutarate is the  
433 organic acid substrate for ammonium assimilation in plants (Fig. 4A, Table 1).

434 The response of disaccharides to drought in the stem differed strongly between the two  
435 genotypes (Fig. 4A,D). A critical component of the functional stay-green trait in sorghum is the  
436 prevention of stalk lodging (Rosenow *et al.*, 1996; Sanchez *et al.*, 2002). Decreased stalk sugar  
437 levels during grain filling can contribute to higher stalk lodging rates (Rosenow *et al.*, 1996;  
438 Sanchez *et al.*, 2002; Wang *et al.*, 2020). The metabolomic profiling of sugars in the upper stem  
439 (below the peduncle) revealed that disaccharide levels (sucrose, trehalose, and cellobiose) all  
440 decreased in droughted RTx430 relative to control, whereas they were maintained or slightly  
441 increased in the stay-green genotype BTx642 (Fig. 4A,D).

442 In terms of lipidomics, drought in both genotypes induced levels of polyunsaturated  
443 triacylglycerides (TAGs) (Fig. 4B-C). This is particularly interesting because polyunsaturated  
444 TAGs have been correlated with the photoprotective response to drought in greenhouse-grown  
445 plants of *Arabidopsis thaliana*, wheat, and native Australian grass and tree species (Marchin *et al.*  
446 *et al.*, 2017; Ferreira *et al.*, 2021). The presence of this response in post-flowering field-droughted  
447 plants suggested the activation of photoprotective responses under these conditions, a topic that  
448 will be explored further in the next section.

449

450 *Stronger photoprotective response minimizes photooxidative stress in BTx642*

451 To maintain photosynthetic leaf area in drought, plants must effectively manage  
452 photooxidative stress induced under drought conditions. However, the importance of  
453 photoprotective responses to post-flowering drought tolerance has not been examined. In our  
454 study, droughted plants of both genotypes did not experience a shared reduction in chlorophyll  
455 levels in upper canopy leaves or  $F_v/F_m$  until the D4 timepoint, at which point green leaf area had  
456 visually declined as well (Fig. 5A, 3H, Table 1). Transcriptomic data revealed that chlorophyllase  
457 (*CHLI*), the enzyme responsible for release of phytol during chlorophyll degradation, was induced  
458 in both genotypes coinciding with the drop in chlorophyll levels (Fig. S5A). Additionally,  $q_L$ ,  
459 which represents the fraction of open PSII reaction centers, was not depressed by drought in either  
460 genotype until the D3 and D4 timepoints (Fig. S5B). These results highlight the extent to which  
461 sorghum minimizes photooxidative stress and damage in post-flowering drought.

462 However, indicators of photooxidative stress tended to emerge sooner and more strongly  
463 in droughted RTx430 plants relative to the stay-green genotype BTx642.  $F_v/F_m$  in droughted  
464 RTx430 was lower at D3 and D4 relative to droughted BTx642 (Fig. 3H). A pattern of greater  
465 photooxidative stress in droughted RTx430 relative to BTx642 is also consistent with the observed  
466 greater decrease in green leaf area in droughted RTx430 relative to BTx642 (Table 1).

467 Several lines of evidence point to a more robust drought-induced photoprotective response  
468 in the stay-green BTx642 genotype. Non-photochemical quenching (NPQ) was induced  
469 specifically in droughted BTx642 in mid-afternoon measurements (Fig. 5B). Supporting this  
470 genotype-specific induction of NPQ, the de-epoxidation state of the xanthophyll pool was  
471 specifically higher in droughted BTx642 relative to the control conditions (5C-E). These NPQ  
472 measurements were performed specifically on non-senesced portions of leaves to maintain an  
473 accurate representation of photoprotective responses in tissues that are still active in  
474 photosynthesis. Beyond NPQ, higher total ascorbate levels were maintained in droughted BTx642  
475 in contrast to RTx430 (Fig. 4A, 5F). In the transcriptomic data, several ascorbate enzymes were  
476 induced in both genotypes in drought (Fig. S4), consistent with the enhanced demand for ascorbate  
477 to ameliorate ROS stress (Laxa *et al.*, 2019). Further, the chloroplast-localized antioxidant  $\alpha$ -  
478 tocopherol and the epidermis-enriched photoprotective flavonoid, rutin, were specifically induced  
479 in droughted BTx642 (Fig. 5G, 2A). An explanation for why tocopherols might have been induced  
480 specifically in droughted BTx642 can be found in the higher transcript level for several genes  
481 involved in tocopherol biosynthesis, such as Sobic.004G024600 (*LIL3*), Sobic.010G207900

482 (VTE2-2), and Sobic.006G260800 (VTE5), in droughted BTx642 relative to droughted RTx430  
483 (Fig. S6).

484 Taken together, a stronger photoprotective capacity in droughted BTx642 may limit  
485 photooxidative damage and thereby, minimize the extent of drought-induced early leaf senescence  
486 under these conditions relative to RTx430 (Table 1). The role of photoprotection in preventing  
487 drought-induced leaf senescence is well-established, particularly in perennials (Murchie *et al.*,  
488 1999; Munné-Bosch *et al.*, 2001; Munné-Bosch and Peñuelas, 2003; Demmig-Adams and Adams,  
489 2006; Challabathula *et al.*, 2018). Thus, if future research confirms that stronger photoprotection  
490 contributes to the stay-green phenotype in sorghum, then this trait would follow the framework of  
491 stay-green as an example of perennial-like traits emerging in an annual plant (Thomas and  
492 Howarth, 2000).

493

#### 494 *Identifying putative candidate genes underlying stay-green in sorghum*

495

496 We have combined in-field physiological analysis with transcriptomic and metabolomic  
497 analysis of rapidly frozen tissues to reveal new insights into drought tolerance in sorghum. The  
498 RTx430 and BTx642 sorghum genotypes maintained  $P_n$  values on par with control plants early in  
499 the day throughout the grain filling period despite long-term water deprivation (Fig. 1,2). Mid-  
500 afternoon depressions in  $P_n$  in droughted plants were driven largely by stomatal closure early in  
501 the drought period (Fig. 2). In the later stages of drought, levels of photoinhibition increased (Fig.  
502 2H) and green leaf area declined (Table 1) particularly in the RTx430 genotype. The stay-green  
503 BTx642 genotype more strongly induced photoprotective responses (Table 1, Fig. 2, 4, 5). These  
504 included genotype-specific drought induction of NPQ and tocopherols in BTx642, supporting a  
505 previously uncharacterized role for photoprotective pathways in the functional stay-green trait  
506 (Fig. 5). Of particular interest from the metabolomic datasets are molecules that may act as  
507 regulators of drought tolerance, such as fumarate, which may contribute to drought-induction of  
508 stomatal closure, and polyunsaturated TAGs, which may act to minimize excess ROS  
509 accumulation (Fig. 4) (Araújo *et al.*, 2011; Ferreira *et al.*, 2021). In contrast, whole-tissue ABA  
510 levels and proline remained largely non-drought responsive (Fig. 4).

511 One means to alleviate the drought-induced decline in photosynthetic rates observed here  
512 in the mid-afternoon would be to attenuate expression or altogether disrupt certain genes that  
513 participate in drought-induced stomatal closure in sorghum via gene editing. Such an approach



514 would rest on the idea that genotypes may be overly responsive to the threat of excess water loss  
515 in drought. By tuning down this response—but not entirely blocking it—it may be possible to  
516 sustain higher photosynthetic rates in the grain-filling period without overly exacerbating water  
517 loss rates. Given the stronger response of  $g_s$  in RTx430 to drought (Fig. 2), one means to identify  
518 sorghum genes that control drought-induced stomatal closure is to look for orthologs to known  
519 positive regulators of stomatal closure, as characterized in model plant species, and to determine  
520 which are more strongly induced by drought in RTx430 relative to BTx642 (Khan *et al.*, 2013; Ge  
521 *et al.*, 2015). Examples that fit this pattern include the MAP kinase Sobic.007G046100 (*MPK4*)  
522 and the homologs of ABA-insensitive G-protein  $\alpha$ -subunits Sobic.003G242200,  
523 Sobic.009G213000, and Sobic.003G198200 (Fig. 7). As sorghum cell-type specific transcriptomes  
524 are made available, it will be important to determine which of these putative stomatal regulators  
525 are strongly expressed in guard cells.

526 Drought also causes photooxidative stress, leading to ROS-induced early leaf senescence.  
527 In this study, BTx642 appears to have stronger photoprotective capacity in post-flowering drought  
528 based on higher NPQ levels (Fig. 5B-C), induction of photoprotective molecules (e.g.  $\alpha$ -tocopherol  
529 (Fig. 5D) and rutin (Fig. 4)), maintenance of high ascorbate pool size (Fig. 6), and less  
530 photooxidative damage and leaf senescence relative to RTx430 (Table 1, Fig. 2). Given the higher  
531 abundance of transcripts for tocopherol biosynthetic genes in the stay-green genotype BTx642,  
532 boosting tocopherol levels in RTx430 via over-expression of tocopherol biosynthesis enzymes  
533 may be one avenue to inhibit drought-induced early leaf senescence in sorghum (Liu *et al.*, 2008;  
534 Zhan *et al.*, 2019). A second avenue to improve stay-green capacity in RTx430 could involve  
535 increasing NPQ capacity by post-flowering drought over-expression of the NPQ regulator *PSBS*,  
536 or by supporting a more de-epoxidized xanthophyll cycle pool for NPQ (Głowacka *et al.*, 2018).

537 As the challenges of climate change impact agriculture in the coming decades, the ability  
538 to confer a functional post-flowering drought tolerance to drought-susceptible genotypes provides  
539 a path towards maintaining or even improving yields with limited water inputs. The diverse, yet  
540 synergistic, pathways underlying sorghum drought tolerance that are outlined in this work support  
541 several possible avenues to achieve this goal, with field-level resolution substantiating these  
542 phenotypes. Building upon this study, our insights into the transcriptional and molecular  
543 underpinnings of stay-green in sorghum can be used to select targets for gene editing to test their  
544 involvement in post-flowering drought tolerance and to improve crop productivity under drought.

545

546 **Acknowledgments:**

547

548 We thank for their help in collecting field data and processing plant samples, Mimi  
549 Broderson, Ryan McCombs, Olga Gaidarenko, Christine Pagotan, Gauri Kapse, Chandler  
550 Sutherland, Victoria Kim, Kiflom Aregawi, Claudia Jane Bucheli, Rachel Bosynak, Lili Montaya,  
551 Cynthia Amstutz, Gabriella Benko, Jeffrey Johnson, Jianqiang Shen, and Chase Turnbull. We  
552 thank Nicholas Karavolias for his advice on data analysis.

553

554 **Author Contributions**

555 CRB, KKN, PGL, JD, RBH, and KK designed and planned the research. CRB and DP  
556 conducted experiments, collected field samples, and analyzed data. LGC, OD, and AK conducted  
557 experiments and collected/processed field samples. RBH, BJC, AB, JYL, YMK, JEK, KJB, and  
558 VP conducted experiments and analyzed data. CA, JP, and JS collected/processed field samples.  
559 CRB wrote the manuscript with contributions from BJC, AB, JYL, and YMK. The manuscript was  
560 edited by KKN, JD, PGL, DP, and AK. OD and AK contributed equally to this work. CA, JP, and  
561 JS contributed equally to this work. AB, JYL, and YMK contributed equally to this work.

562

563 **Conflict of interest statement**

564

565 The authors declare that they have no conflict of interest, financial or otherwise, that influenced  
566 this manuscript.

567

568 **Funding**

569

570 This work was supported by the Gordon and Betty Moore Foundation through Grant  
571 GBMF 2550.03 to the Life Sciences Research Foundation [to C.R.B]. K.K.N. is an investigator  
572 of the Howard Hughes Medical Institute. Funding was also provided by DOE Grant DE-  
573 SC0014081 awarded to co-authors P.G.L., J.D., and R.H.; the US Cooperative Extension Service  
574 through the Division of Agriculture and Natural Resources of the University of California  
575 (P.G.L., J.D., and R.H.); the Berkeley Fellowship and the NSF Graduate Research Fellowship  
576 Program Grant DGE 1752814 (D.P.). Work conducted at the Environmental Molecular Sciences

577 Laboratory (grid.436923.9), a DOE Office of Science User Facility, was sponsored by the Office  
578 of Biological and Environmental Research. The work (proposal:10.46936/10.25585/60001015)  
579 conducted by the U.S. Department of Energy Joint Genome Institute, a DOE Office of Science  
580 User Facility, is supported by the Office of Science of the U.S. Department of Energy operated  
581 under Contract No. DE-AC02-05CH11231.

582

583 **Data availability**

584 The data that support the findings of this study are available from the corresponding  
585 author upon reasonable request.

586

587

## 588 **References**

- 589 **Agati G, Tattini M.** 2010. Multiple functional roles of flavonoids in photoprotection. *New phytologist*  
590 **186**, 786–793.
- 591 **Araújo WL, Fernie AR, Nunes-Nesi A.** 2011. Control of stomatal aperture: a renaissance of the old  
592 guard. *Plant signaling & behavior* **6**, 1305–1311.
- 593 **Ayub G, Smith RA, Tissue DT, Atkin OK.** 2011. Impacts of drought on leaf respiration in  
594 darkness and light in *Eucalyptus saligna* exposed to industrial-age atmospheric CO<sub>2</sub> and growth  
595 temperature. *New phytologist* **190**, 1003–1018.
- 596 **Bloom AJ, Burger M, Kimball BA, Pinter PJ Jr.** 2014. Nitrate assimilation is inhibited by elevated  
597 CO<sub>2</sub> in field-grown wheat. *Nature climate change* **4**, 477–480.
- 598 **Blum A.** 2009. Effective use of water (EUW) and not water-use efficiency (WUE) is the target of crop  
599 yield improvement under drought stress. *Field crops research* **112**, 119–123.
- 600 **Borrell AK, Hammer GL, Douglas ACL.** 2000. Does maintaining green leaf area in sorghum improve  
601 yield under drought? I. leaf growth and senescence. *Crop science* **40**, 1026–1037.
- 602 **Borrell A, Hammer G, Van Oosterom E.** 2001. Stay-green: a consequence of the balance between  
603 supply and demand for nitrogen during grain filling? *Annals of applied biology* **138**, 91–95.
- 604 **Borrell AK, Mullet JE, George-Jaeggli B, van Oosterom EJ, Hammer GL, Klein PE, Jordan DR.**  
605 2014a. Drought adaptation of stay-green sorghum is associated with canopy development, leaf anatomy,  
606 root growth, and water uptake. *Journal of experimental botany* **65**, 6251–6263.
- 607 **Borrell AK, van Oosterom EJ, Mullet JE, George-Jaeggli B, Jordan DR, Klein PE, Hammer GL.**  
608 2014b. Stay-green alleles individually enhance grain yield in sorghum under drought by modifying  
609 canopy development and water uptake patterns. *New phytologist* **203**, 817–830.
- 610 **Cao X, Wu L, Wu M, Zhu C, Jin Q, Zhang J.** 2020. Abscisic acid mediated proline biosynthesis and  
611 antioxidant ability in roots of two different rice genotypes under hypoxic stress. *BMC plant biology* **20**,  
612 198.
- 613 **Challabathula D, Zhang Q, Bartels D.** 2018. Protection of photosynthesis in desiccation-tolerant  
614 resurrection plants. *Journal of plant physiology* **227**, 84–92.
- 615 **Chong J, Soufan O, Li C, Caraus I, Li S, Bourque G, Wishart DS, Xia J.** 2018. MetaboAnalyst 4.0:  
616 towards more transparent and integrative metabolomics analysis. *Nucleic acids research* **46**, W486–  
617 W494.
- 618 **Clair G, Reehl S, Stratton KG, Monroe ME, Tffaily MM, Ansong C, Kyle JE.** 2019. Lipid Mini-On:  
619 mining and ontology tool for enrichment analysis of lipidomic data. *Bioinformatics* **35**, 4507–4508.
- 620 **Clifton-Brown JC, Lewandowski I, Bangerth F, Jones MB.** 2002. Comparative responses to water  
621 stress in stay-green, rapid-and slow senescing genotypes of the biomass crop, *Miscanthus*. *New*  
622 *phytologist* **154**, 335–345.
- 623 **Cousins AB, Adam NR, Wall GW, Kimball BA, Pinter PJ Jr, Ottman MJ, Leavitt SW, Webber**  
624 **AN.** 2002. Photosystem II energy use, non-photochemical quenching and the xanthophyll cycle in

- 625 *Sorghum bicolor* grown under drought and free-air CO<sub>2</sub> enrichment (FACE) conditions. *Plant, cell &*  
626 *environment* **25**, 1551–1559.
- 627 **Crasta OR, XU WW, Rosenow DT, Mullet J, Ngyugen HT.** 1999. Mapping of post-flowering drought  
628 resistance traits in grain sorghum: association between QTLs influencing senescence and maturity.  
629 *Molecular Genetics and Genomics* **262**, 579-588.
- 630 **Cruz de Carvalho MH.** 2008. Drought stress and reactive oxygen species: production, scavenging and  
631 signaling. *Plant signaling & behavior* **3**, 156–165.
- 632 **Demmig-Adams B, Adams WW 3rd.** 2006. Photoprotection in an ecological context: the remarkable  
633 complexity of thermal energy dissipation. *New phytologist* **172**, 11–21.
- 634 **Epron D, Dreyer E, Breda N.** 1992. Photosynthesis of oak trees [*Quercus petraea* (Matt.) Liebl.] during  
635 drought under field conditions: diurnal course of net CO<sub>2</sub> assimilation and photochemical efficiency of  
636 photosystem II. *Plant, cell & environment* **15**, 809–820.
- 637 **Ferreira D, Figueiredo J, Laureano G, Machado A, Arrabaça JD, Duarte B, Figueiredo A, Matos**  
638 **AR.** 2021. Membrane remodelling and triacylglycerol accumulation in drought stress resistance: The case  
639 study of soybean phospholipases A. *Plant physiology and biochemistry: PPB / Societe francaise de*  
640 *physiologie vegetale* **169**, 9–21.
- 641 **Gao C, Montoya L, Xu L, et al.** 2019. Strong succession in arbuscular mycorrhizal fungal communities.  
642 *The ISME journal* **13**, 214–226.
- 643 **Ge X-M, Cai H-L, Lei X, Zhou X, Yue M, He J-M.** 2015. Heterotrimeric G protein mediates ethylene-  
644 induced stomatal closure via hydrogen peroxide synthesis in *Arabidopsis*. *The Plant journal: for cell and*  
645 *molecular biology* **82**, 138–150.
- 646 **Giordano M.** 2009. Global groundwater? Issues and solutions. *Annual review of environment and*  
647 *resources* **34**, 153–178.
- 648 **Giordano M, Barron J, Ünver O.** 2019. Water scarcity and challenges for smallholder farmers. In:  
649 Campanhola C., In: Pandey S, eds. *Sustainable Food and Agriculture: An Integrated Approach*. Rome,  
650 Italy: Academic Press/Food and Agriculture Organizations of the United Nations, 75–94.
- 651 **Głowacka K, Kromdijk J, Kucera K, Xie J, Cavanagh AP, Leonelli L, Leakey ADB, Ort DR, Niyogi**  
652 **KK, Long SP.** 2018. Photosystem II Subunit S overexpression increases the efficiency of water use in a  
653 field-grown crop. *Nature communications* **9**, 868.
- 654 **Golding AJ, Johnson GN.** 2003. Down-regulation of linear and activation of cyclic electron transport  
655 during drought. *Planta* **218**, 107–114.
- 656 **Harris K, Subudhi PK, Borrell A, Jordan D, Rosenow D, Nguyen H, Klein P, Klein R, Mullet J.**  
657 2007. Sorghum stay-green QTL individually reduce post-flowering drought-induced leaf senescence.  
658 *Journal of experimental botany* **58**, 327–338.
- 659 **Hörtensteiner S, Kräutler B.** 2011. Chlorophyll breakdown in higher plants. *Biochimica et biophysica*  
660 *acta* **1807**, 977–988.
- 661 **Jung S.** 2004. Variation in antioxidant metabolism of young and mature leaves of *Arabidopsis thaliana*  
662 subjected to drought. *Plant science* **166**, 459–466.

- 663 **Kamal NM, Alnor Gorafi YS, Abdelrahman M, Abdellatef E, Tsujimoto H.** 2019. Stay-green trait: a  
664 prospective approach for yield potential, and drought and heat stress adaptation in globally important  
665 cereals. *International journal of molecular sciences* **20**.
- 666 **Khan M, Rozhon W, Bigeard J, Pflieger D, Husar S, Pitzschke A, Teige M, Jonak C, Hirt H,**  
667 **Poppenberger B.** 2013. Brassinosteroid-regulated GSK3/shaggy-like kinases phosphorylate mitogen-  
668 activated protein (MAP) kinase kinases, which control stomata development in *Arabidopsis thaliana*.  
669 *Journal of biological chemistry* **288**, 7519–7527.
- 670 **Kimber CT.** 2000. Origins of domesticated sorghum and its early diffusion to India and China. In:  
671 Wayne Smith C., In: Frederiksen RA, eds. *Sorghum: origin, history, technology, and production*. New  
672 York, NY, USA: John Wiley & Sons, .
- 673 **Kim Y-M, Nowack S, Olsen MT, et al.** 2015. Diel metabolomics analysis of a hot spring  
674 chlorophototrophic microbial mat leads to new hypotheses of community member metabolisms. *Frontiers*  
675 *in microbiology* **6**, 209.
- 676 **Kind T, Wohlgemuth G, Lee DY, Lu Y, Palazoglu M, Shahbaz S, Fiehn O.** 2009. FiehnLib: mass  
677 spectral and retention index libraries for metabolomics based on quadrupole and time-of-flight gas  
678 chromatography/mass spectrometry. *Analytical chemistry* **81**, 10038–10048.
- 679 **Krieg DR, Hutmacher RB.** 1986. Photosynthetic rate control in sorghum: stomatal and nonstomatal  
680 factors 1. *Crop science* **26**, 112–117.
- 681 **Kyle JE, Crowell KL, Casey CP, Fujimoto GM, Kim S, Dautel SE, Smith RD, Payne SH, Metz TO.**  
682 2017. LIQUID: an-open source software for identifying lipids in LC-MS/MS-based lipidomics data.  
683 *Bioinformatics* **33**, 1744–1746.
- 684 **Laxa M, Liebthal M, Telman W, Chibani K, Dietz K-J.** 2019. The role of the plant antioxidant system  
685 in drought tolerance. *Antioxidants* **8**, 94.
- 686 **Lesk C, Rowhani P, Ramankutty N.** 2016. Influence of extreme weather disasters on global crop  
687 production. *Nature* **529**, 84–87.
- 688 **Lima Neto MC, Cerqueira JVA, da Cunha JR, Ribeiro RV, Silveira JAG.** 2017. Cyclic electron  
689 flow, NPQ and photorespiration are crucial for the establishment of young plants of *Ricinus communis*  
690 and *Jatropha curcas* exposed to drought. *Plant biology* **19**, 650–659.
- 691 **Liu X, Hua X, Guo J, Qi D, Wang L, Liu Z, Jin Z, Chen S, Liu G.** 2008. Enhanced tolerance to  
692 drought stress in transgenic tobacco plants overexpressing VTE1 for increased tocopherol production  
693 from *Arabidopsis thaliana*. *Biotechnology letters* **30**, 1275–1280.
- 694 **Li Z, Wakao S, Fischer BB, Niyogi KK.** 2009. Sensing and responding to excess light. *Annual review*  
695 *of plant biology* **60**, 239–260.
- 696 **Lobell DB, Roberts MJ, Schlenker W, Braun N, Little BB, Rejesus RM, Hammer GL.** 2014. Greater  
697 sensitivity to drought accompanies maize yield increase in the U.S. Midwest. *Science* **344**, 516–519.
- 698 **Logan BA, Korniyev D, Hardison J, Holaday AS.** 2006. The role of antioxidant enzymes in  
699 photoprotection. *Photosynthesis research* **88**, 119–132.
- 700 **Lopez JR, Erickson JE, Munoz P, Saballos A, Felderhoff TJ, Vermerris W.** 2017. QTLs associated  
701 with crown root angle, stomatal conductance, and maturity in Sorghum. *The plant genome* **10**.

- 702 **Loriaux SD, Avenson TJ, Welles JM, McDermitt DK, Eckles RD, Riensche B, Genty B.** 2013.  
703 Closing in on maximum yield of chlorophyll fluorescence using a single multiphase flash of sub-  
704 saturating intensity. *Plant, cell & environment* **36**, 1755–1770.
- 705 **Luo L, Mei H, Yu X, et al.** 2019. Water-saving and drought-resistance rice: from the concept to practice  
706 and theory. *Molecular breeding* **39**, 145.
- 707 **Marchin RM, Turnbull TL, Deheinzeln AI, Adams MA.** 2017. Does triacylglycerol (TAG) serve a  
708 photoprotective function in plant leaves? An examination of leaf lipids under shading and drought.  
709 *Physiologia plantarum* **161**, 400–413.
- 710 **Munné-Bosch S, Jubany-Marí T, Alegre L.** 2001. Drought-induced senescence is characterized by a  
711 loss of antioxidant defences in chloroplasts. *Plant, cell & environment* **24**, 1319–1327.
- 712 **Munné-Bosch S, Peñuelas J.** 2003. Photo- and antioxidative protection during summer leaf senescence  
713 in *Pistacia lentiscus* L. grown under Mediterranean field conditions. *Annals of botany* **92**, 385–391.
- 714 **Murchie EH, Chen Y, Hubbart S, Peng S, Horton P.** 1999. Interactions between senescence and leaf  
715 orientation determine in situ patterns of photosynthesis and photoinhibition in field-grown rice. *Plant*  
716 *physiology* **119**, 553–564.
- 717 **Nakayasu ES, Nicora CD, Sims AC, et al.** 2016. MPLEx: a Robust and Universal Protocol for Single-  
718 Sample Integrative Proteomic, Metabolomic, and Lipidomic Analyses. *mSystems* **1**, e00043–16.
- 719 **Noctor G, Mhamdi A, Foyer CH.** 2014. The roles of reactive oxygen metabolism in drought: not so cut  
720 and dried. *Plant physiology* **164**, 1636–1648.
- 721 **Ogbaga CC, Stepien P, Johnson GN.** 2014. Sorghum (*Sorghum bicolor*) varieties adopt strongly  
722 contrasting strategies in response to drought. *Physiologia plantarum* **152**, 389–401.
- 723 **Ort DR, Long SP.** 2014. Limits on yields in the Corn Belt. *Science* **344**, 484–485.
- 724 **O’Shaughnessy SA, Evett SR, Colaizzi PD, Howell TA.** 2012. A crop water stress index and time  
725 threshold for automatic irrigation scheduling of grain sorghum. *Agricultural water management* **107**, 122–  
726 132.
- 727 **Pluskal T, Castillo S, Villar-Briones A, Oresic M.** 2010. MZmine 2: modular framework for  
728 processing, visualizing, and analyzing mass spectrometry-based molecular profile data. *BMC*  
729 *bioinformatics* **11**, 395.
- 730 **Rosenow DT, Clark LE.** 1995. Drought and lodging resistance for a quality sorghum crop. 50th annual  
731 corn and sorghum industry research conference. Chicago, IL, USA, 6–7.
- 732 **Rosenow DT, Ejeta G, Clark LE, Gilbert ML, Henzell RG, Borrell AK, Muchow RC.** 1996.  
733 Breeding for pre- and post-flowering drought stress resistance in sorghum. International conference on  
734 genetic improvement of sorghum and pearl millet. Lincoln, NE, USA, 400–411.
- 735 **Sanchez AC, Subudhi PK, Rosenow DT, Nguyen HT.** 2002. Mapping QTLs associated with drought  
736 resistance in sorghum (*Sorghum bicolor* L. Moench). *Plant molecular biology* **48**, 713–726.
- 737 **Thomas H, Howarth CJ.** 2000. Five ways to stay green. *Journal of experimental botany* **51**, 329–337.
- 738 **Tuberosa R, Sanguineti MC, Landi P.** 1994. Abscisic acid concentration in leaf and xylem sap, leaf

- 739 water potential, and stomatal conductance in maize. *Crop science* **34**, 1557–1563.
- 740 **Tuinstra MR, Grote EM, Goldsbrough PB, Ejeta G.** 1997. Genetic analysis of post-flowering drought  
741 tolerance and components of grain development in *Sorghum bicolor* (L.) Moench. *Molecular breeding* **3**,  
742 439–448.
- 743 **Varoquaux N, Cole B, Gao C, et al.** 2019. Transcriptomic analysis of field-droughted sorghum from  
744 seedling to maturity reveals biotic and metabolic responses. *Proceedings of the National Academy of*  
745 *Sciences of the United States of America* **116**, 27124–27132.
- 746 **Varshney RK, Tuberosa R, Tardieu F.** 2018. Progress in understanding drought tolerance: from alleles  
747 to cropping systems. *Journal of experimental botany* **69**, 3175–3179.
- 748 **Wang X, Mace E, Tao Y, Cruickshank A, Hunt C, Hammer G, Jordan D.** 2020. Large-scale genome-  
749 wide association study reveals that drought-induced lodging in grain sorghum is associated with plant  
750 height and traits linked to carbon remobilisation. *Theoretical and applied genetics*. **133**, 3201–3215.
- 751 **Xu L, Naylor D, Dong Z, et al.** 2018. Drought delays development of the sorghum root microbiome and  
752 enriches for monoderm bacteria. *Proceedings of the National Academy of Sciences of the United States of*  
753 *America* **115**, E4284–E4293.
- 754 **Yin CY, Berninger F, Li CY.** 2006. Photosynthetic responses of *Populus przewalski* subjected to  
755 drought stress. *Photosynthetica* **44**, 62–68.
- 756 **Zhang X, Romm M, Zheng X, et al.** 2016. SPE-IMS-MS: An automated platform for sub-sixty second  
757 surveillance of endogenous metabolites and xenobiotics in biofluids. *Clinical mass spectrometry* **2**, 1–10.
- 758 **Zhan W, Liu J, Pan Q, et al.** 2019. An allele of ZmPORB2 encoding a protochlorophyllide  
759 oxidoreductase promotes tocopherol accumulation in both leaves and kernels of maize. *Plant journal* **100**,  
760 114–127.
- 761



762 **Tables**

Table 1: Harvest and selected leaf phenotypic responses to terminal post-flowering drought

| Variable                                     | BTx642  |         |                       | RTx430  |         |                       | One-way ANOVA                |                              |
|----------------------------------------------|---------|---------|-----------------------|---------|---------|-----------------------|------------------------------|------------------------------|
|                                              | Control | Drought | Δ (Drought - Control) | Control | Drought | Δ (Drought - Control) | BTx642 (Drought vs. control) | RTx430 (Drought vs. control) |
| Flowering time (DAP)                         | 69.33   | 67.00   | -2.33                 | 70.67   | 70.67   | 0                     | n.s.                         | n.s.                         |
| Forage (65% moisture) (Mg ha <sup>-1</sup> ) | 29.19   | 26.32   | -2.87                 | 29.77   | 24.01   | -5.76                 | n.s.                         | n.s.                         |
| 1000 seed (g)                                | 26.70   | 28.87   | 2.17                  | 30.55   | 27.98   | -2.57                 | n.s.                         | n.s.                         |
| Grain (13% moisture) (Mg ha <sup>-1</sup> )  | 1.97    | 2.38    | 0.40                  | 3.07    | 2.51    | -0.56                 | n.s.                         | n.s.                         |
| Green leaf area (%)                          | 95.80%  | 85.18%  | -10.62%               | 98.38%  | 75.68%  | -22.70%               | **                           | ***                          |
| OA (MPa)                                     |         |         | -0.66                 |         |         | -1.48                 | ***                          | ***                          |
| Stomatal density (mM <sup>-2</sup> )         | 124.77  | 131.35  | 6.58                  | 119.46  | 134.74  | 15.27                 | *                            | *                            |
| Guard cell length (μM)                       | 80.17   | 73.95   | 6.22                  | 84.03   | 70.15   | 13.89                 | *                            | **                           |
| Stomatal index                               | 20.47   | 21.37   | 0.89                  | 18.33   | 16.54   | -1.79                 | n.s.                         | n.s.                         |
| Leaf 1 length (cm)                           | 68.65   | 65.43   | -3.41                 | 75.91   | 72.30   | -3.61                 | *                            | *                            |
| C/N                                          | 17.60   | 22.85   | 5.25                  | 18.47   | 24.04   | 5.57                  | **                           | **                           |
| N <sub>org</sub> (mg/g DW <sup>-1</sup> )    | 24.10   | 18.86   | -4.30                 | 23.74   | 18.12   | -4.19                 | **                           | **                           |

763

764 <sup>1</sup>Significant *p*-values determined using a one-way ANOVA are denoted by asterisks; \* = *p* < 0.05, \*\* = *p* < 0.005,

765 \*\*\* = *p* < 0.0005, (*n.s.* = not significant).

766

Table S1: Change in total soil profile water content(cm soil water) during time periods shown

| measurement period (dates) |        | CONTROL treatment |       |       |       | POST-FLOWER STRESS treatment |        |        |       |
|----------------------------|--------|-------------------|-------|-------|-------|------------------------------|--------|--------|-------|
| start                      | end    | BTx642 CULTIVAR   |       |       |       | BTx642 CULTIVAR              |        |        |       |
|                            |        | rep 1             | rep 2 | aver  | stdev | rep 1                        | rep 2  | aver   | stdev |
| 22-Jun                     | 2-Jul  | -2.79             | -3.25 | -3.02 | 0.32  | -2.67                        | -3.02  | -2.84  | 0.25  |
| 2-Jul                      | 23-Jul | -1.96             | -1.68 | -1.82 | 0.20  | -1.75                        | -1.55  | -1.65  | 0.14  |
| 23-Jul                     | 12-Aug | -3.33             | -3.18 | -3.25 | 0.11  | -3.23                        | -3.58  | -3.40  | 0.25  |
| 12-Aug                     | 9-Sep  | -4.17             | -3.76 | -3.96 | 0.29  | -8.10                        | -8.46  | -8.28  | 0.25  |
| 9-Sep                      | 1-Oct  | -2.84             | -2.72 | -2.78 | 0.09  | -11.10                       | -11.73 | -11.42 | 0.45  |
| 1-Oct                      | 21-Oct | -3.78             | -4.14 | -3.96 | 0.25  | -12.42                       | -13.69 | -13.06 | 0.90  |

  

| measurement period (dates) |        | CONTROL treatment |       |       |       | POST-FLOWER Stress treatment |        |        |       |
|----------------------------|--------|-------------------|-------|-------|-------|------------------------------|--------|--------|-------|
| start                      | end    | RTx430 CULTIVAR   |       |       |       | RTx430 CULTIVAR              |        |        |       |
|                            |        | rep 1             | rep 2 | aver  | stdev | rep 1                        | rep 2  | aver   | stdev |
| 22-Jun                     | 2-Jul  | -3.96             | -3.66 | -3.81 | 0.22  | -3.53                        | -3.96  | -3.75  | 0.31  |
| 2-Jul                      | 23-Jul | -3.30             | -3.18 | -3.24 | 0.09  | -3.25                        | -3.53  | -3.39  | 0.20  |
| 23-Jul                     | 12-Aug | -4.78             | -4.14 | -4.46 | 0.45  | -4.50                        | -4.17  | -4.33  | 0.23  |
| 12-Aug                     | 9-Sep  | -4.85             | -4.57 | -4.71 | 0.20  | -7.75                        | -7.19  | -7.47  | 0.40  |
| 9-Sep                      | 1-Oct  | -3.15             | -3.02 | -3.09 | 0.09  | -9.80                        | -9.37  | -9.59  | 0.31  |
| 1-Oct                      | 21-Oct | -2.77             | -2.95 | -2.86 | 0.13  | -10.54                       | -10.72 | -10.63 | 0.13  |

767

768 <sup>1</sup>Last irrigation in post-flowering drought plots occurred on August 15<sup>th</sup>. Insufficient neutron probes were available to  
 769 cover the third replicate plots.

Table S2: Ambient light and air temperature at four sampling trips

|               | Morning       |                                                          | Mid-afternoon |                                                          |
|---------------|---------------|----------------------------------------------------------|---------------|----------------------------------------------------------|
| Sampling trip | Avg. temp(°C) | Light intensity ( $\mu\text{mol m}^{-2} \text{s}^{-1}$ ) | Avg. temp(°C) | Light intensity ( $\mu\text{mol m}^{-2} \text{s}^{-1}$ ) |
| D1            | 24.26         | 998.03                                                   | 32.90         | 1444.15                                                  |
| D2            | 28.30         | 1199.99                                                  | 39.14         | 1879.52                                                  |
| D3            | 21.58         | 1050.10                                                  | 31.73         | 1649.98                                                  |
| D4            | 26.00         | 1050.60                                                  | 31.49         | 1591.29                                                  |

770

771

772 **Figures**

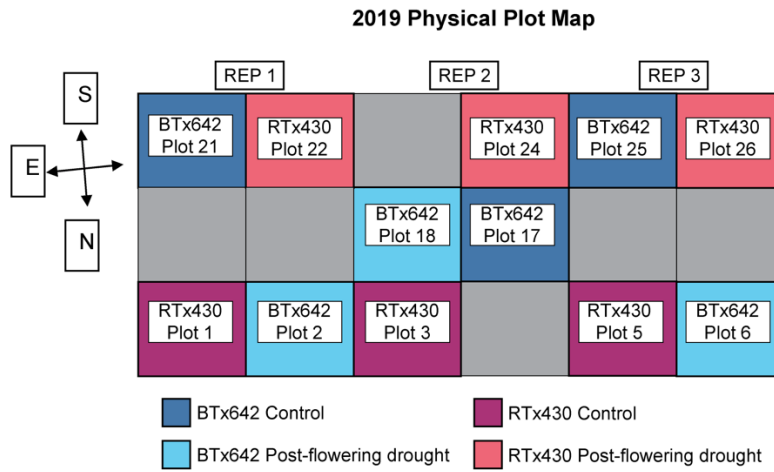

773

774 **Supplemental figure 1:** Field layout of 2019 sorghum field trials. Sorghum grown in sandy loam  
775 soils at the University of California Kearney Agricultural Research and Extension Center in  
776 Parlier, CA, USA. BTx642 control (dark blue), BTx642 drought (light blue), RTx430 control  
777 (purple), and RTx430 drought (pink).

778

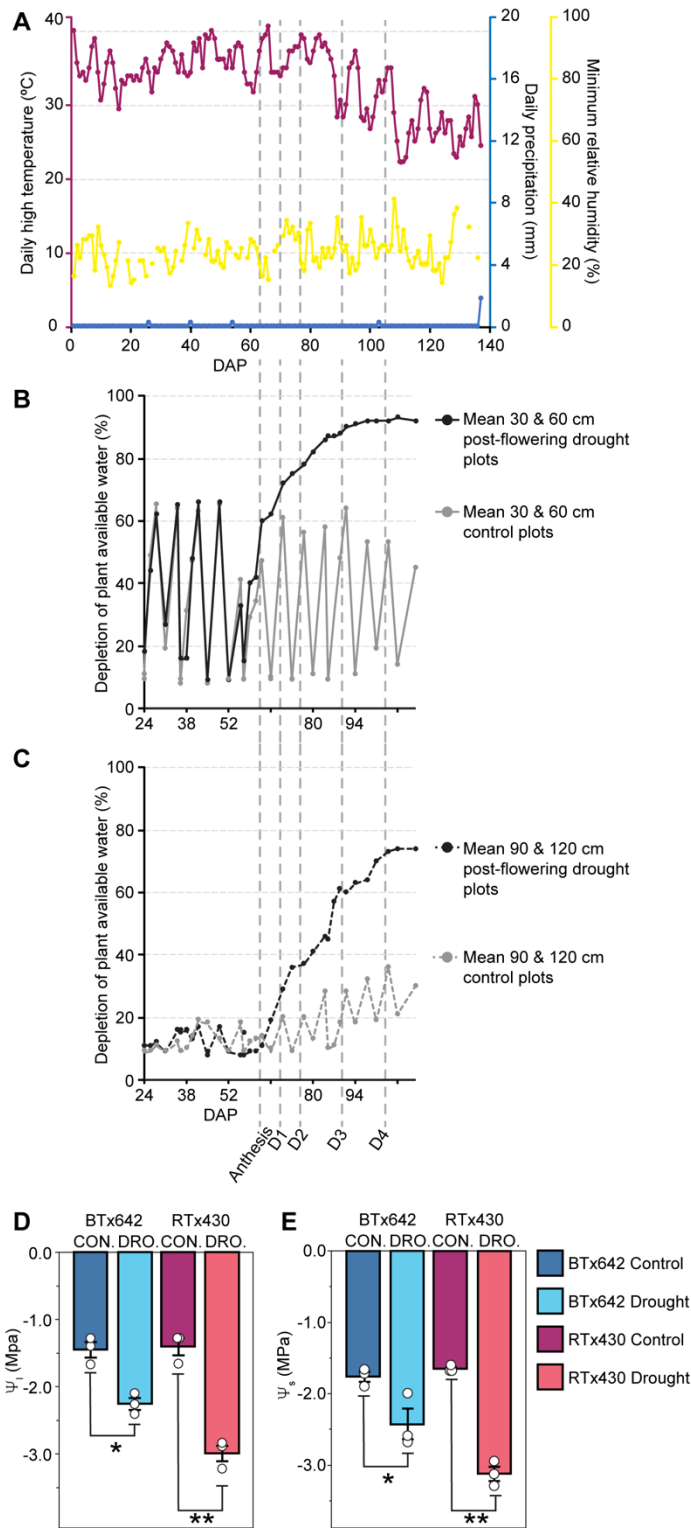

**Figure 1:** Field conditions, soil water depletion, and leaf water potential response to terminal drought stress. (A) Data collected from June 11 to October 26, 2019 at Parlier Weather Station A (Parlier, CA, USA). Daily high temperature (axis 1, magenta), daily precipitation (axis 2, blue), and minimum relative humidity (axis 3, yellow). The y-axis upper bound for each variable is set to the daily annual maximum value for 2019. (B-C) Soil water data expressed as percent plant available soil water depletion between -0.02 MPa (field capacity) and -1.5 MPa (permanent wilting point). Drought plots (dark grey) and control plots (light grey) with sensors at (B) 30 and 60 cm (solid lines) and (C) 90 and 120 cm depth (dashed lines). Sampling dates are labeled as D1 through D4. (D) Midday leaf water potential ( $\Psi_l$ ) and (E) osmotic potential ( $\Psi_s$ ) collected on D4 (40 days without water). BTx642 control (dark blue), BTx642 drought (light blue), RTx430 control (purple), and RTx430 drought (pink). Mean values  $\pm$  standard errors ( $n = 3$  plots) with mean values for each individual plot displayed

807 as dots (white). Significant differences as measured by a two-tailed  $t$ -test for control vs.  
 808 treatment pairs are indicated by asterisks (\* < 0.05, \*\* < 0.005).

809

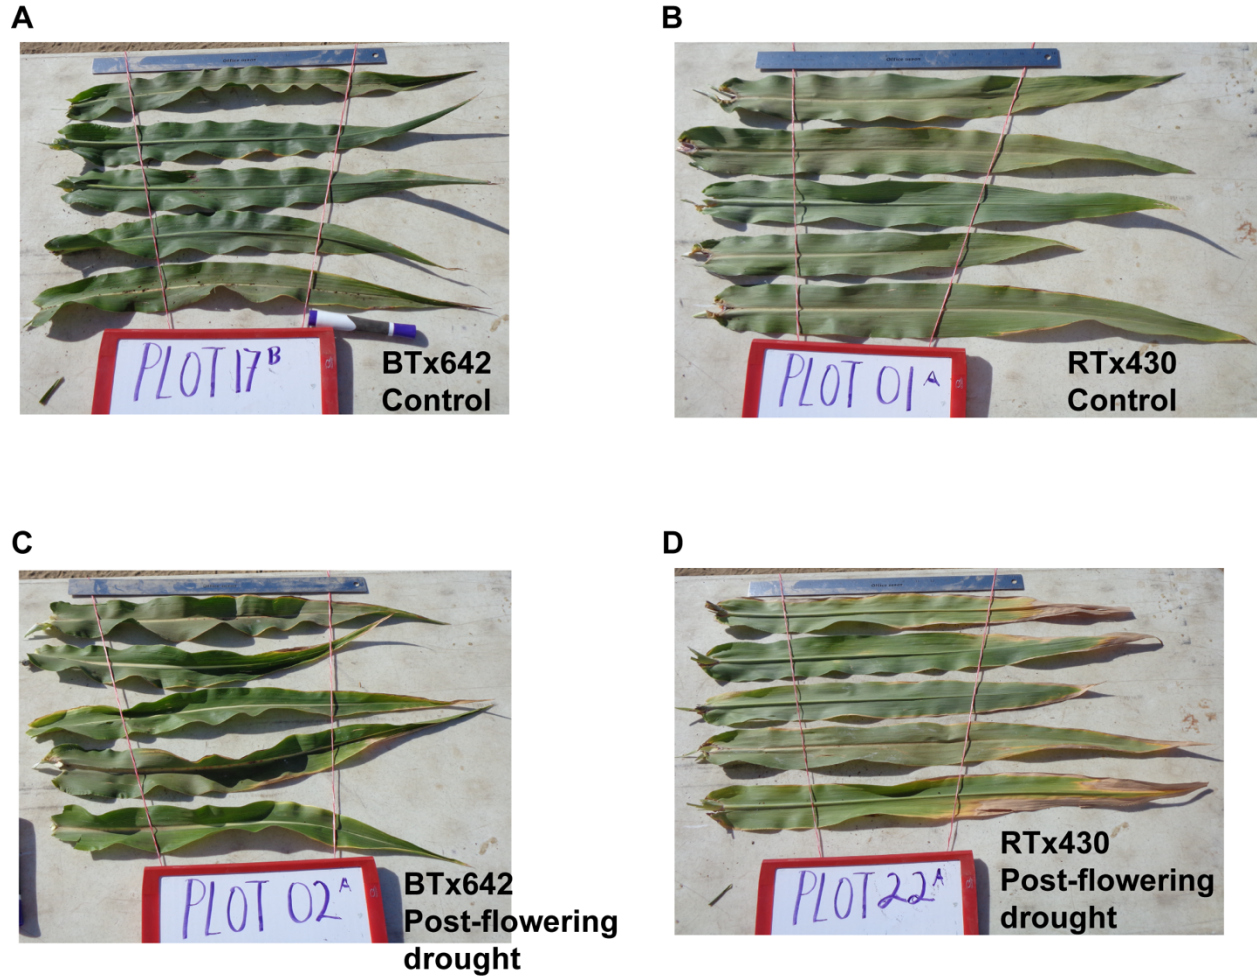

810

811 **Supplemental figure 2:** Representative photos of leaves in control and post-flowering drought  
812 plots. Leaves sampled on D4 (40 days without water for droughted plots) from five different plants  
813 and a randomly selected leaf from the uppermost three leaves including flag leaves. (A) BTx642  
814 control, (B) RTx430 control, (C) BTx642 post-flowering drought, (D) RTx430 post-flowering  
815 drought.

816

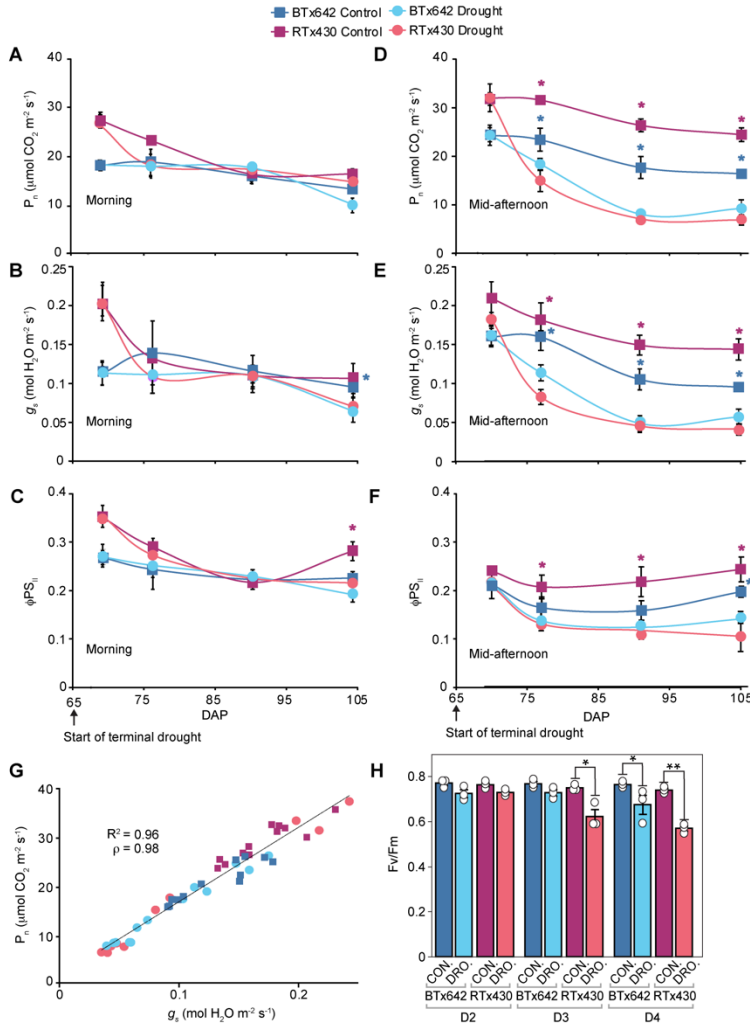

**Figure 2:** Photosynthetic response to terminal drought stress. (A-H) BTx642 control (dark blue), BTx642 drought (light blue), RTx430 control (purple), and RTx430 drought (pink). (A-C) Measurements in the morning (9:30 to 11:00) and (D-F) collected in mid-afternoon (14:00 to 16:00 on the uppermost three leaves. (A,D) net photosynthetic rate ( $P_n$ ), (B,E) stomatal conductance ( $g_s$ ), and (C,F) electron flow through photosystem II ( $\Phi PS_{II}$ ). Light levels ranged between 1651.3 to 1880.5  $\mu\text{mol photons m}^{-2} \text{s}^{-1}$  for mid-

837 afternoon measurements and 1001.4 to 1199.4  $\mu\text{mol photons m}^{-2} \text{s}^{-1}$  for mid-afternoon  
 838 measurements.  $T_{air}$  values for D1–D4 were 33.0°C, 39.3°C, 31.6°C, and 31.5°C, respectively, for  
 839 mid-afternoon measurements and 23.9°C, 28.1°C, 21.6°C, and 25.7°C, respectively, for morning  
 840 measurements. Mean values  $\pm$  standard errors ( $n = 3$  plots). (A-F) Color of the asterisk denotes  
 841 which control vs. treatment pair has a  $p < 0.05$  by a two-tailed  $t$ -test. (G) Linear curve fit to mid-  
 842 afternoon  $g_s$  and  $P_n$  values for each plot from D1–D4 timepoints with  $R^2$  and Pearson correlation  
 843 coefficient ( $\rho$ ) values. (H) Maximum quantum efficiency of PSII ( $F_v/F_m$ ) measured after 20 min  
 844 of dark acclimation in the mid-afternoon. Mean values  $\pm$  standard errors ( $n = 3$  plots) with mean  
 845 values for each individual plot displayed as dots (white). Significant differences, as measured by  
 846 a two-tailed  $t$ -test for control vs. treatment pairs, are indicated by asterisks (\*  $< 0.05$ , \*\*  $< 0.005$ ).  
 847

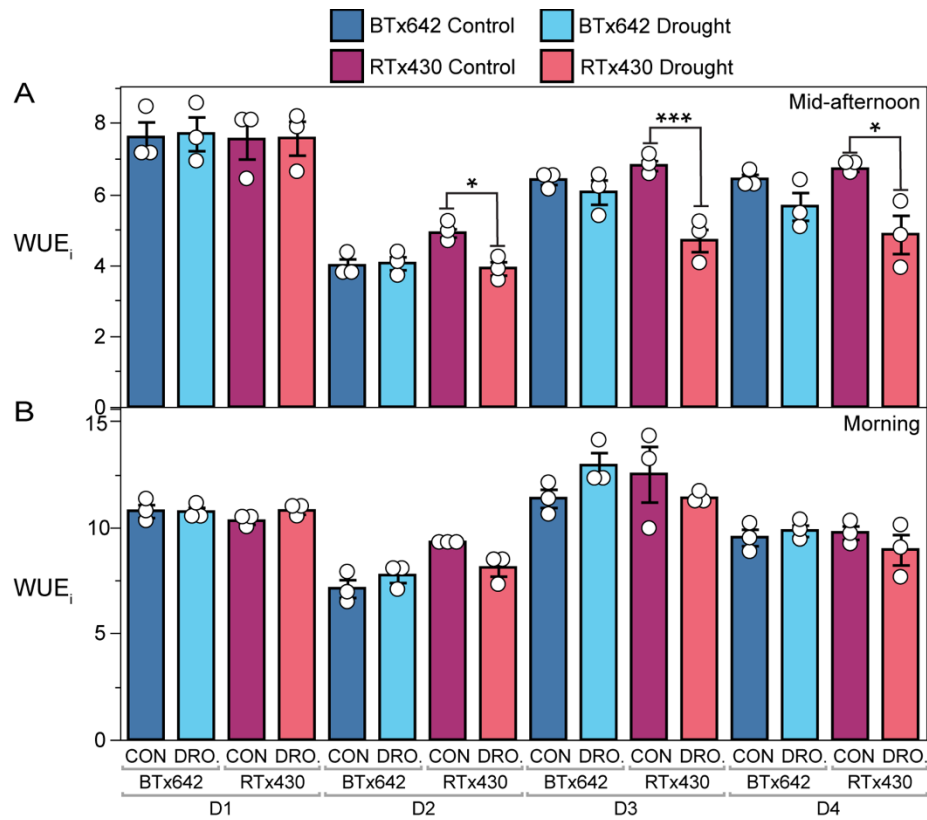

848

849 **Supplemental Figure S3:** Instantaneous water-use efficiency ( $WUE_i$ ) for (A) mid-afternoon  
 850 measurements (14:00 to 16:00) and (B) morning measurements (9:30 to 11:00). Mean values  $\pm$   
 851 standard errors ( $n = 3$  plots) with mean values for each individual plot displayed as dots (white).  
 852 Significant differences as measured by a two-tailed  $t$ -test for control vs. treatment pairs are  
 853 indicated by asterisks (\*  $< 0.05$ , \*\*  $< 0.005$ , \*\*\*  $< 0.0005$ ). BTx642 control (dark blue), BTx642  
 854 drought (light blue), RTx430 control (purple), and RTx430 drought (pink).

855

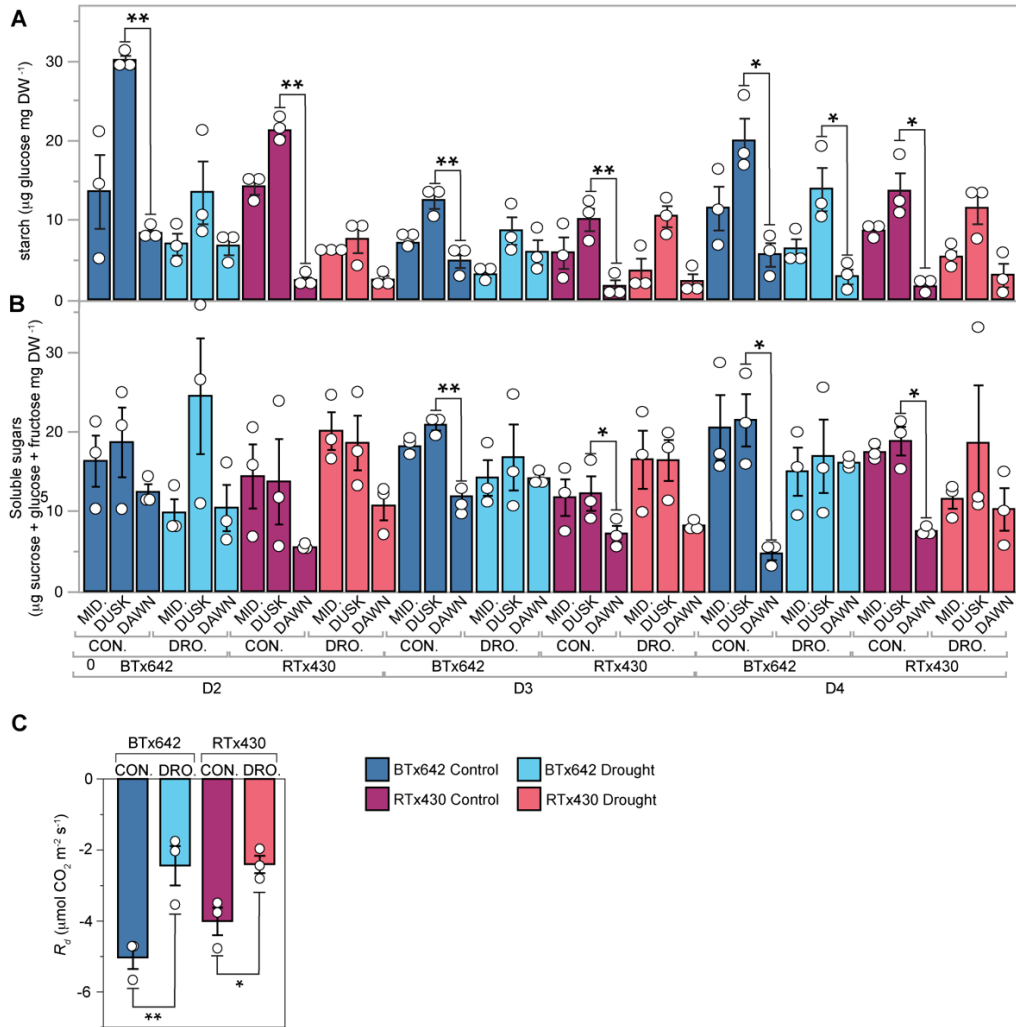

856

857 **Figure 3:** Diurnal starch and sugar accumulation and dark respiration rate. (A) Starch levels  
 858 quantified as glucose forming units and (B) leaf soluble sugars quantified as the sum of sucrose,  
 859 glucose, and fructose from the upper canopy (leaves 1-3) collected within an hour of dawn  
 860 (DAWN), midday (MID.), and within an hour of dusk (DUSK). (C) Dark respiration ( $R_d$ )  
 861 quantified after 20 min of dark acclimation in mid-afternoon. Mean values  $\pm$  standard errors ( $n =$   
 862 3 plots) with mean values for each individual plot displayed as dots (white). Significant differences  
 863 as measured by a two-tailed  $t$ -test for control vs. treatment pairs are indicated by asterisks (\* <  
 864 0.05, \*\* < 0.005). BTx642 control (dark blue), BTx642 drought (light blue), RTx430 control  
 865 (purple), and RTx430 drought (pink).

866



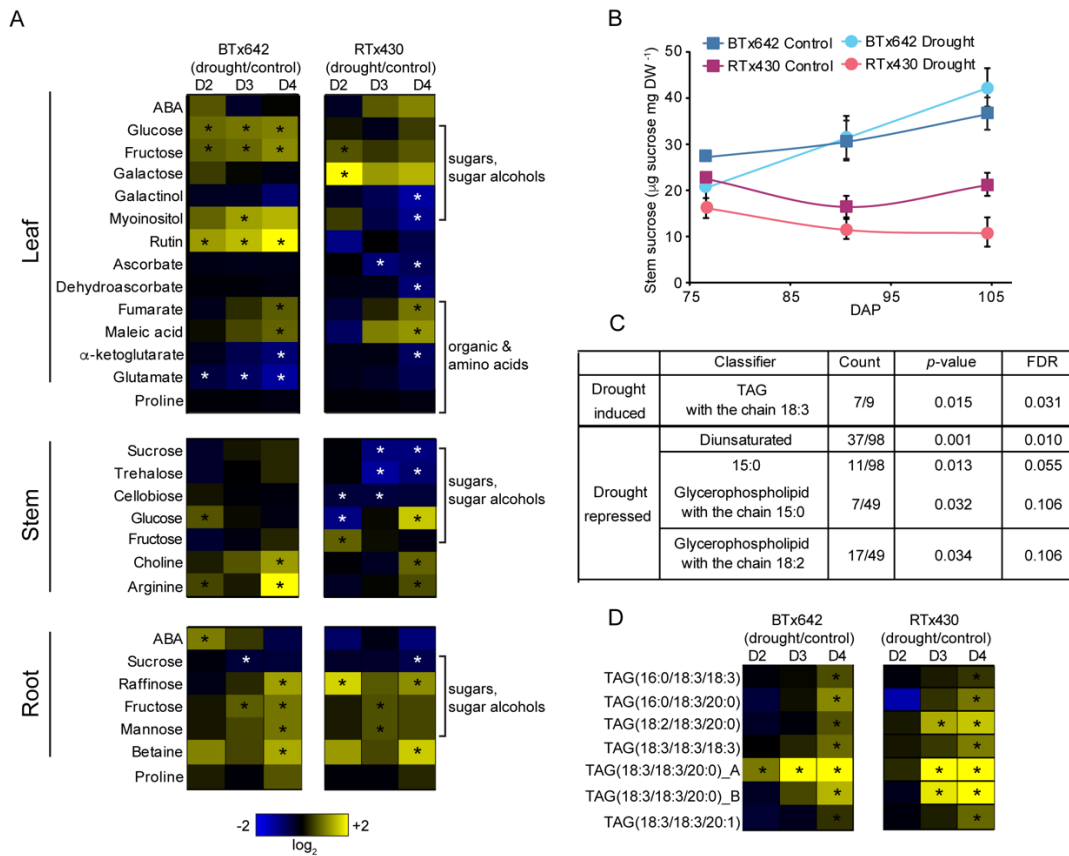

867

868 **Figure 4:** Metabolic and lipidomic acclimation to terminal drought stress in sorghum. (A)  
 869 Differential abundance for selected metabolites from the three uppermost leaves (upper panels),  
 870 the upper stem segment below the peduncle (middle panels), and the roots in the first 24 cm of soil  
 871 (lower panels) for BTx642 (left) and RTx430 (right) at three sampling dates: D2 (column 1), D3  
 872 (column 2), and D4 (column 3). Metabolite abundance in  $\log_2$  scale with elevated concentration in  
 873 drought (yellow) and decreased in drought (blue). Significant differences in abundance as  
 874 determined by a two-tailed *t* test ( $p < 0.05$ ) in drought vs. control are indicated by an asterisk.  
 875 Black and white asterisks do not have separate meanings. (B) Sucrose levels measured  
 876 spectrophotometrically from stem samples. Mean values  $\pm$  standard errors ( $n = 3$  plots). BTx642  
 877 control (dark blue squares), BTx642 drought (light blue circles), RTx430 control (purple squares),  
 878 and RTx430 drought (pink circles). (C) Lipid Mini-On (Clair *et al.*, 2019) lipid enrichment analysis  
 879 for drought (BTx642 and RTx430 plots) vs. control (BTx642 and RTx430 plots) leaf samples from  
 880 the D4 sampling date. Triacylglycerol is abbreviated as TAG in B and C. (D) Differential  
 881 abundance for leaf TAG lipids with a 18:3 sidechain induced by drought in both genotypes.  
 882 Visualized in the same manner as panel A.

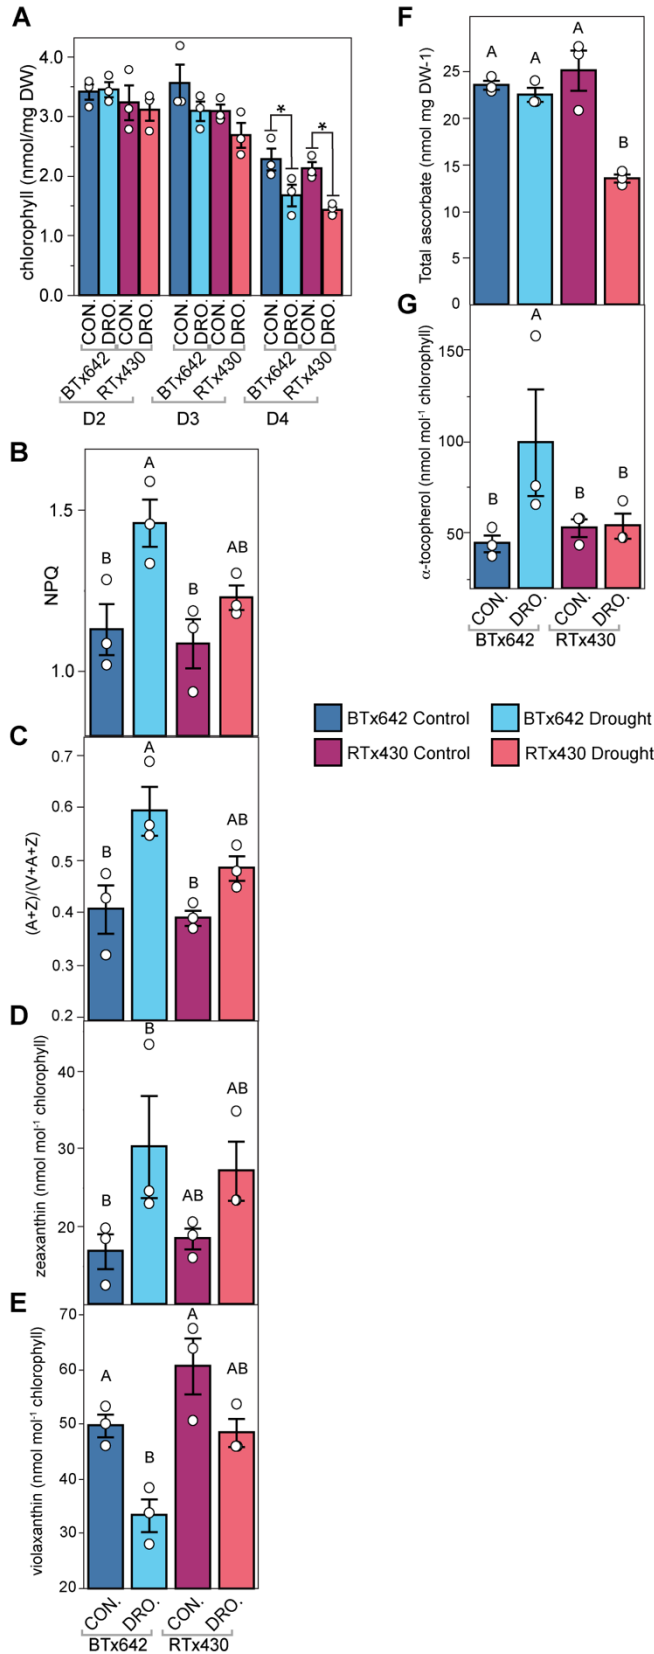

**Figure 5:** Photoprotective response to terminal drought stress. (A) Chlorophyll levels measured in the uppermost three leaves at the D2–D4 timepoints from samples collected at dawn. From the D4 timepoints, (B) non-photochemical quenching (NPQ) measured at mid-afternoon, (C) epoxidation state of the Violaxanthin + Antheraxanthin + Zeaxanthin (VAZ) pool measured as (A+Z)/(V+A+Z), (D) zeaxanthin, (E) antheraxanthin, (F) total ascorbate levels, and (G) α-tocopherol levels. (C–G) From leaf samples collected in the mid-afternoon. Mean values ± standard errors (*n* = 3 plots) with mean values for each individual plot displayed as dots (white). BTx642 control (dark blue), BTx642 drought (light blue), RTx430 control (purple), and RTx430 drought (pink). (A) Significant differences as measured by a two-tailed *t*-test for control vs. treatment pairs are indicated by asterisks (\* < 0.05). (B–G) Mean values that share the same letters are not statistically different, and those that do not share the same letters are statistically different based on one-way ANOVA and post hoc Tukey–Kramer HSD tests.

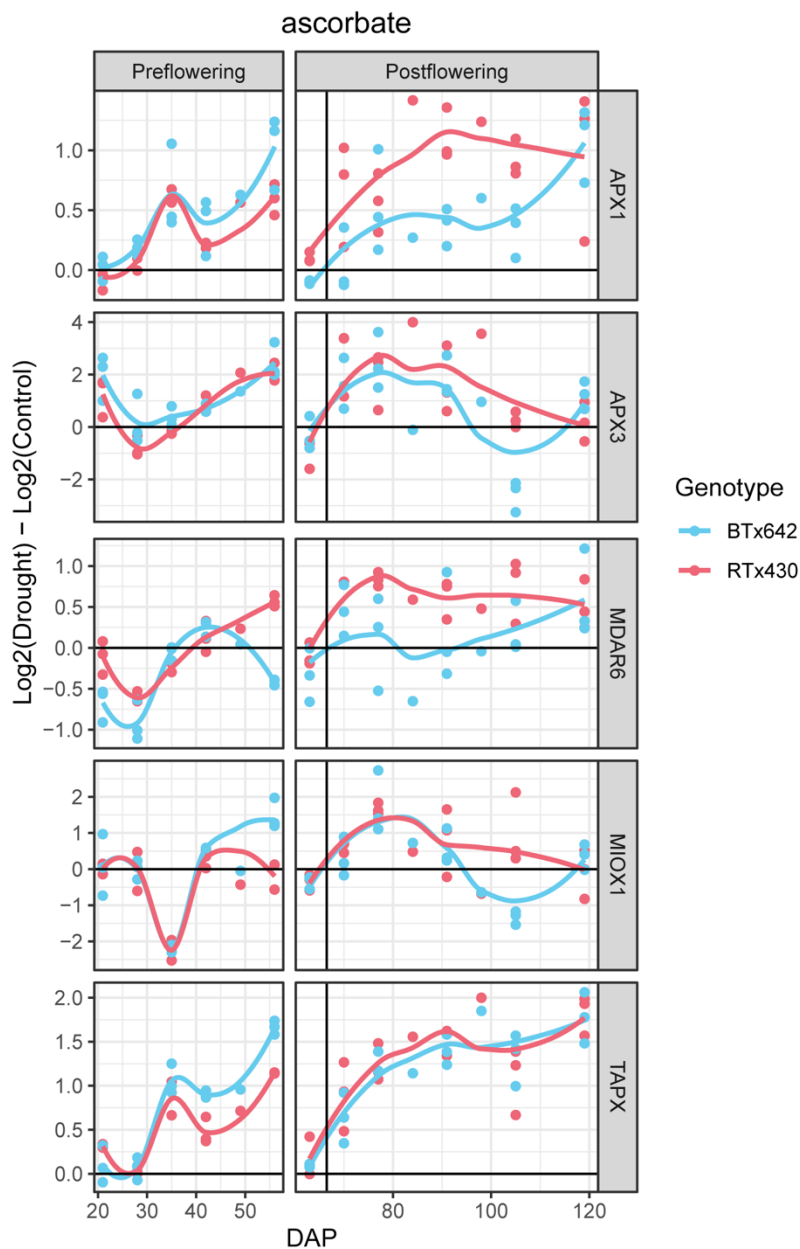

913  
914 **Supplemental figure 4:** Log<sub>2</sub> fold change in transcript abundance in drought versus control in leaf  
915 tissue for ascorbate peroxidase genes, Sobic.001G410200 (*APX1*), Sobic.006G021100 (*APX3*),  
916 Sobic.006G084400 (*TAPX*); for monodehydroascorbate reductase gene, Sobic.007G038600  
917 (*MDAR6*). BTx642 in light blue, RTx430 in pink.  
918

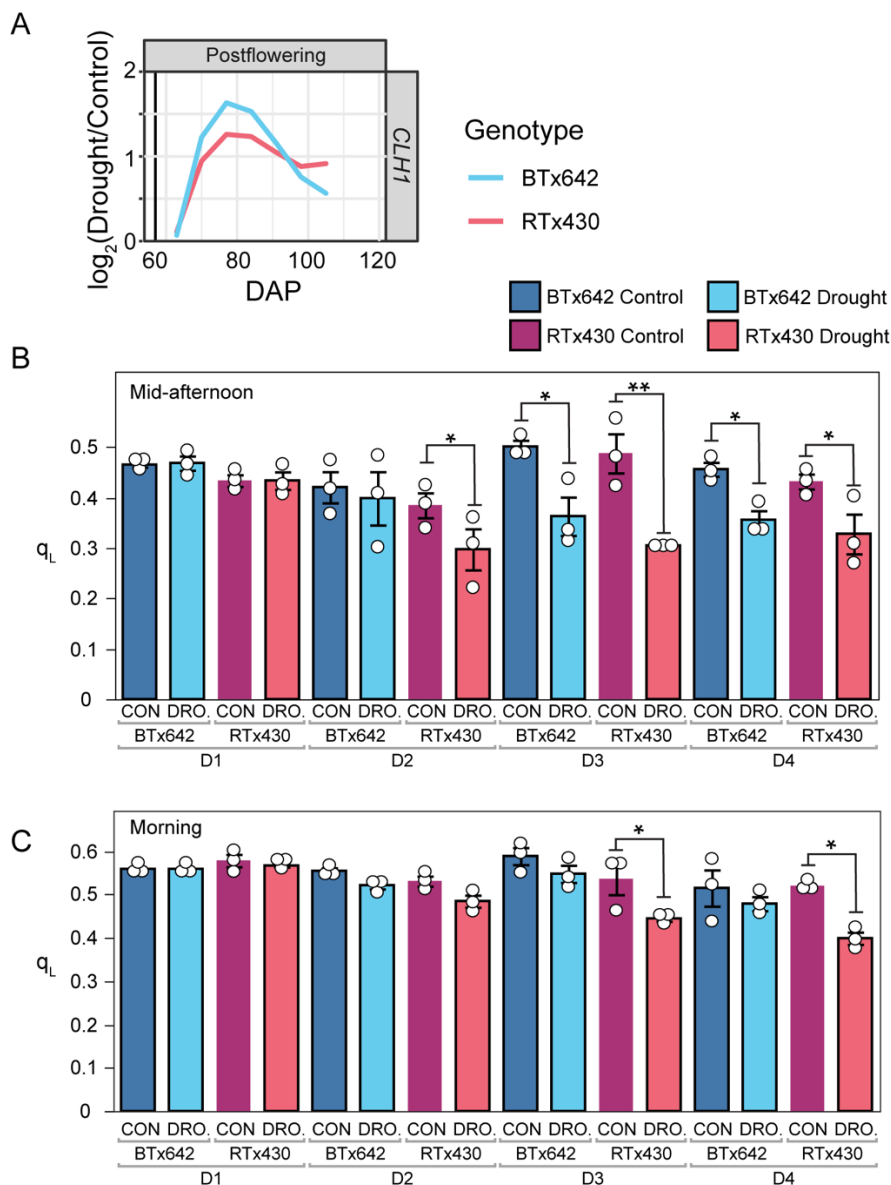

919  
 920 **Supplemental figure 5:** Induction of chlorophyll degradation and response of  $q_L$  in terminal  
 921 drought. (A) Log<sub>2</sub> fold change in transcript abundance in leaf tissue for drought versus control for  
 922 the chlorophyllase gene, Sobic.007G168000 (*CHL1*). (B-C) Redox state of the fraction of open  
 923 PSII reaction centers measured as  $q_L$  for (B) mid-afternoon measurements (14:00 to 16:00) and  
 924 (C) morning measurements (9:30 to 11:00). Mean values  $\pm$  standard errors ( $n = 3$  plots) with mean  
 925 values for each individual plot displayed as dots (white). Significant differences as measured by a  
 926 two-tailed  $t$ -test for control vs. treatment pairs are indicated by asterisks (\*  $< 0.05$ , \*\*  $< 0.005$ ).  
 927 BTx642 control (dark blue), BTx642 drought (light blue), RTx430 control (purple), and RTx430  
 928 drought (pink).

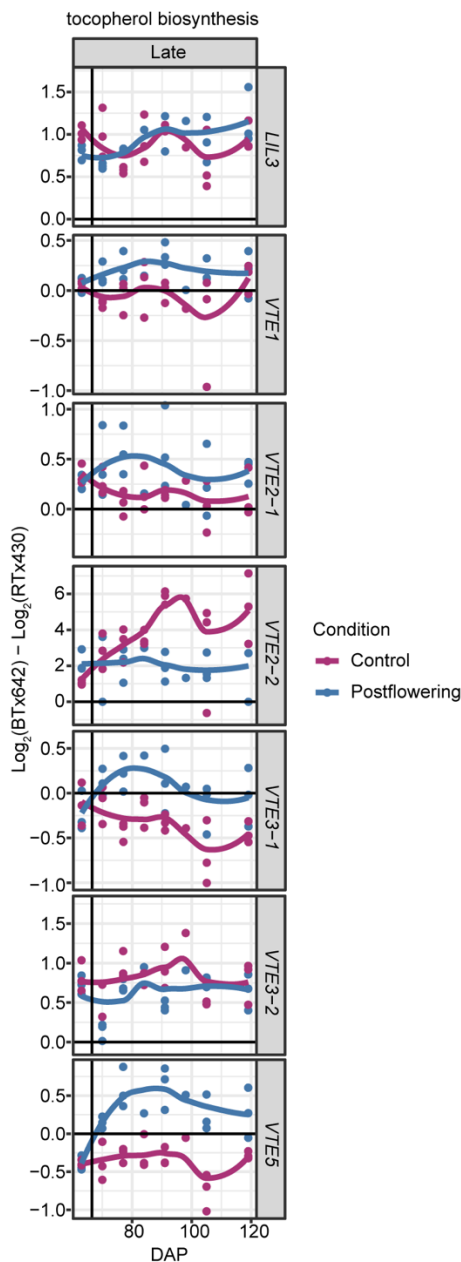

929  
930 **Supplemental figure 6:** Log<sub>2</sub> fold change in transcript abundance across genotypes (BTx642  
931 versus RTx430) in leaf tissue for drought versus control for tocopherol biosynthesis genes:  
932 Sobic.004G024600 (*LIL3*), Sobic.004G125800 (*VTE1*), Sobic.010G215600 (*VTE2-1*),  
933 Sobic.010G207900 (*VTE2-2*), Sobic.008G171300 (*VTE3-1*), Sobic.008G171000 (*VTE3-2*), and  
934 Sobic.006G260800 (*VTE5*). Log<sub>2</sub> (BTx642 control/RTx430 control) in dark blue and log<sub>2</sub>  
935 (BTx642 post-flowering drought/RTx430 post-flowering drought) in purple.  
936

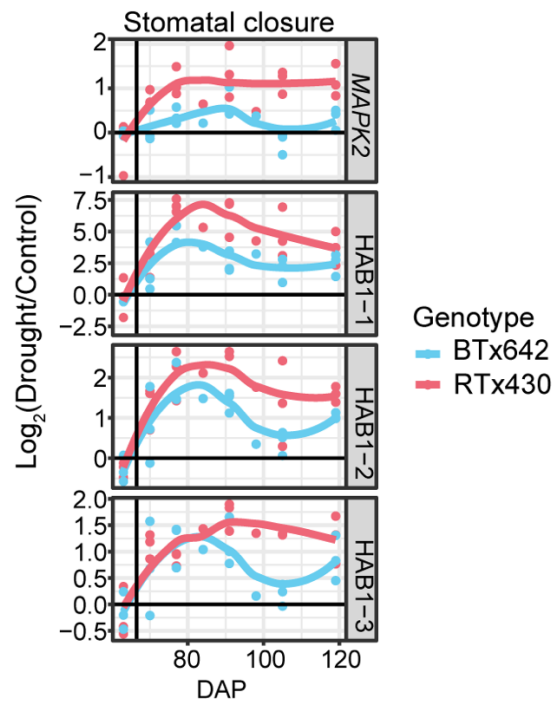

937

938 **Figure 6:**  $\text{Log}_2$  fold change in transcript abundance in leaf tissue for drought versus control for the  
939 orthologs of drought-responsive regulators of stomatal closure that are induced more strongly in  
940 RTx430 in response to post-flowering drought, Sobic.007G046100 (*MAPK2*), Sobic.003G242200  
941 (*HABI-1*), Sobic.009G213000 (*HABI-2*), and Sobic.003G198200 (*HABI-3*). BTx642 in light  
942 blue, RTx430 in pink.

943

944

945

946 **Supplemental materials**

947

948 **Supplemental materials & methods**

949

950 *Field growth conditions and crop evapotranspiration*

951

952 Crop evapotranspiration was determined using potential evapotranspiration measured at  
953 an on-site CIMIS (CA Irrigation Management Information System) weather station multiplied by  
954 the crop coefficient, which was adjusted according to crop growth stage. See Xu et al. for details  
955 regarding estimation of evapotranspiration rates, irrigation management, and drought treatment  
956 measurements (Xu *et al.*, 2018). Briefly, Crop Water Stress Index measurements were  
957 performed using a combination of fixed position infrared thermometers (IRT) and handheld-IRT  
958 mid-afternoon measurements on select dates across drought progression in combination with  
959 continuous monitoring of air temperature and relative humidity using an in-field weather station  
960 (O'Shaughnessy *et al.*, 2012). Soil water potential and soil water content were monitored using  
961 soil matric potential sensors and neutron probes, respectively. Matric potential sensors will be  
962 installed at multiple depths to represent the most active water uptake portions of the crop root  
963 zone (at 30 cm increments from 15 cm depth to 105 cm). Neutron probe access tubes were  
964 installed to a depth of 1.5 m in select plots, and soil water measurements were taken at 30 cm  
965 increments.

966 The treatment conditions were assigned via a randomized block design, where the fields  
967 were divided into 18 plots of 10 rows each, each plot randomly assigned a watering treatment  
968 (control and post-flowering drought) and in 2019, three genotypes (RTx430, BTx642, and  
969 RTx7000), with 3 replicates, for a total of 18 plots. RTx7000 plots were sampled only sparingly  
970 in 2019 due to low seed germination rates as a consequence of non-uniform seed quality (grey  
971 boxes in Fig. S1).

972

973 *Leaf phenotypic traits*

974

975 To avoid edge effects, all phenotypic measurements were conducted on plants in the  
976 interior of each plot. Leaf water potential ( $\psi_l$ ) was measured and flash-frozen samples collected  
977 for measuring osmotic potential ( $\psi_s$ ) readings in the mid-afternoon at the end of sampling day D4  
978 (on September 24, 2019) using PSY1 leaf psychrometers (ICT International, Armidale, Australia)

979 and carefully following the instructional protocols provided with these instruments. Control plots  
980 had not received water for six days and post-flowering drought plots had not received water for 41  
981 days. Three plants per plot were selected and the uppermost leaf below the flag leaf of the main  
982 culm was measured and samples collected at the leaf midpoint (avoiding midrib, equal distance  
983 from the leaf tip and base). The waxy surface of the leaf was partly removed before measuring  $\psi_1$   
984 by gently rubbing the measurement area with aluminum oxide (642991, Sigma-Aldrich, St. Louis,  
985 MO, USA) and then rinsed to remove the excess aluminum oxide before measurement. Stable  $\psi_1$   
986 and  $\psi_s$  values were reached within 40 min of initiating the measurement. Green leaf area and  
987 relative water content (RWC) samples were also collected on September 24, 2019. Green leaf area  
988 was determined by imaging the three uppermost leaves of ten randomly selected plants per plot  
989 and area quantification of visibly senesced and non-senesced leaf area using ImageJ (Schindelin  
990 et al., 2012). A ruler was used in each photograph to normalize the leaf size between digital  
991 photographs.

992 Steady-state photosynthetic rates ( $P_n$ ), stomatal conductance ( $g_s$ ), photosystem II operating  
993 efficiency ( $\Phi_{PSII}$ ), fraction of closed PSII reaction centers ( $q_L$ ), PSII maximum photochemical  
994 efficiency in the light ( $F_v'/F_m'$ ), instantaneous water use efficiency ( $WUE_i$ ), and intracellular  $CO_2$   
995 / atmospheric  $CO_2$  ( $C_i/C_a$ ) were determined using LI-COR 6400XT infrared gas analyzers with a  
996 chlorophyll fluorometer attachment (LI-COR, Lincoln, NE, USA). Light levels (10% blue light)  
997 and chamber temperature was matched to ambient conditions.  $q_L$  was calculated as  $(1/F_s -$   
998  $1/F_m')/(1/F_o' - 1/F_m')$ ,  $\Phi_{PSII}$  as  $(F_m' - F_s)/F_m'$ , and  $F_v'/F_m'$  as  $(F_m' - F_o')/F_m'$ . Respiration in the  
999 dark ( $R_d$ ) and the maximum photochemical efficiency of PSII in the dark ( $F_v/F_m$ ) were measured  
1000 following a 20-min dark acclimation of attached leaves in the field in the mid-afternoon on  
1001 sampling date D4 (09/23 - 09/24/2019). Block temperature was again matched to ambient  
1002 temperatures and relative humidity held between 50% to 60%. Non-photochemical quenching  
1003 (NPQ) was measured as  $(F_m - F_m')/F_m'$  on the same dark-acclimated leaves following a 10-min  
1004 actinic light exposure (10% blue / 90% red) where the light level was matched to the ambient light  
1005 level measured prior to this set of measurements ( $1650 \mu\text{mol photons m}^{-2} \text{s}^{-1}$ ).

1006 Stomatal density and guard cell length were quantified using ImageJ from light microscopy  
1007 images of leaf peels collected on the D4 sampling day from the abaxial leaf surface as described  
1008 in Lopez et al. (Lopez *et al.*, 2017).

1009



1010 *Metabolite extraction and quantification*

1011

1012 Harvested and frozen root, stem, and leaf tissue were ground in a cryogenic Freezer Mill  
1013 (SPEX SamplePrep 6875D, Metuchen NJ USA) for 2-3 cycles of 2-3 min, with 1 min cooling in  
1014 between. Samples were then stored at -80°C. Chlorophyll and total ascorbate were extracted and  
1015 quantified via spectrophotometry as previously described (Arnon, 1949; Queval and Noctor,  
1016 2007). Carotenoids and tocopherol were also extracted using acetone and quantified by high-  
1017 performance liquid chromatography using standard protocols as previously described (Müller-  
1018 Moulé *et al.*, 2002). Soluble sugars were extracted using ethanol and starch in the pellet was  
1019 solubilized by an amylase/amyloglucosidase treatment and quantified spectrophotometrically  
1020 using standard protocols as previously described (Stitt *et al.*, 1989; Smith and Zeeman, 2006).  
1021 Metabolites for gas chromatography-mass spectrometry/mass spectrometry (GC-MS), lipidomics,  
1022 and ion-mobility spectroscopy (IMS) were extracted using a methanol-chloroform extraction as  
1023 previously described (Handakumbura *et al.*, 2017). Leaf tissue samples from sampling days D2,  
1024 D3, and D4 were analyzed by GC-MS, lipidomics, and IMS. Metabolomic data was collected for  
1025 stem and root samples from D2, D3, and D4 sampling dates exclusively by IMS.

1026

1027 *Metabolomics using GC-MS*

1028

1029 The flash-frozen leaf and root were mechanically ground separately using a cryogenic  
1030 freezer mill (SPEX, Metuchen, NJ) kept at cryogenic temperatures with liquid nitrogen. Then  
1031 MPLEx extraction was applied to the samples which were weighed at 1 g (Nakayasu *et al.*, 2016).  
1032 Then, the samples were completely dried under a speed vacuum concentrator. The dried  
1033 metabolites were chemically derivatized and analyzed by gas chromatography-mass spectrometry  
1034 or GC-MS as reported previously (Kim *et al.*, 2015). Briefly, dried samples were derivatized by  
1035 adding 20 µL of methoxyamine solution (30 mg/mL in pyridine) and were incubated at 37 °C for  
1036 90 min to protect the carbonyl groups and reduce carbohydrate isoforms. Then, 80 µL of N-methyl-  
1037 N-(trimethylsilyl)-trifluoroacetamide with 1% trimethylchlorosilane was added to each sample  
1038 and incubated for 30 min as a minimum. The derivatized samples were analyzed by GC/MS within  
1039 24 hours after the derivatization. Data collected by GC/MS were processed using the Metabolite

1040 Detector software, version 2.5 beta (Hiller *et al.*, 2009). Retention indices of detected metabolites  
1041 were calculated based on analysis of the fatty acid methyl esters mixture (C8 - C28), followed by  
1042 chromatographic alignment across all analyses after deconvolution. The intensity values of  
1043 selected three fragmented ions after deconvolution were integrated for a peak value of metabolite.  
1044 Metabolites were initially identified by matching experimental spectra to a PNNL augmented  
1045 version of the Agilent Fiehn Metabolomics Library containing spectra and validated retention  
1046 indices for almost 900 metabolites (Kind *et al.*, 2009) and additionally cross-checked by matching  
1047 with NIST14 GC/MS Spectral Library. All metabolite identifications were manually validated to  
1048 minimize deconvolution and identification errors during the automated data processing. The data  
1049 were log<sub>2</sub> transformed and then mean-centered across the log<sub>2</sub> distribution.

### 1050 *Lipidomics*

1051 Total lipid extracts (TLEs) were analyzed as outlined in Kyle *et al.* (2017). Briefly, a  
1052 Waters Acquity UPLC H class system interfaced with a Velos-ETD Orbitrap mass spectrometer  
1053 was used for LC-ESI-MS/MS analyses. 10 µL of the reconstituted sample was injected onto a  
1054 Waters CSH column (3.0 mm x 150 mm x 1.7 µm particle size) and separated over a 34-min  
1055 gradient (mobile phase A: ACN/H<sub>2</sub>O (40:60) containing 10 mM ammonium acetate; mobile phase  
1056 B: ACN/IPA (10:90) containing 10 mM ammonium acetate) at a flow rate of 250 µL/min. TLEs  
1057 were analyzed in both positive and negative electrospray ionization modes, and lipids were  
1058 fragmented using alternating higher-energy collision dissociation (HCD) and collision-induced  
1059 dissociation (CID) (Kyle *et al.*, 2017). Identifications were made using LIQUID (Kyle *et al.*, 2017)  
1060 and manually validated by examining the MS/MS spectra for fragment ions characteristic of the  
1061 classes and acyl chain compositions of the identified lipids. In addition, the precursor ion isotopic  
1062 profile extracted ion chromatogram, and mass measurement error along with the elution time was  
1063 evaluated. All LC-MS/MS data were aligned and gap-filled to this target library for feature  
1064 identification using MZmine 2 (Pluskal *et al.*, 2010) based on the identified lipid name, observed  
1065 m/z, and retention time. Data from each ionization mode were aligned and gap-filled separately.  
1066 Aligned features were manually verified and peak apex intensity values were exported for  
1067 statistical analysis.

1068

1069 *SPE-IMS-MS Metabolomics Analysis.*

1070 Plant extracts were analyzed by SPE-IMS-MS using a RapidFire 365 (Zhang *et al.*, 2016)  
1071 coupled with an Agilent 6560 Ion Mobility QTOF MS system (Agilent Technologies, Santa Clara,  
1072 CA, USA). The samples were loaded onto three different SPE cartridges using a 10  $\mu$ L loop. For  
1073 the Graphitic Carbon cartridge, the loading solvent consisted of 0.1% formic acid and 99.9% water.  
1074 The analytes were eluted off the cartridge using a combination of 0.1% formic acid, 49.95% water,  
1075 24.98% acetonitrile, and 24.98% acetone. The C18 cartridge used the same loading solvent as the  
1076 Graphitic Carbon but was eluted using 49.95% methanol, 49.95% IPA, and 0.1% formic acid. The  
1077 HILIC cartridge was loaded using 90% acetonitrile and 10% 20 mM ammonium acetate and eluted  
1078 with 90% 20 mM ammonium acetate and 10% acetonitrile. Samples were loaded onto the  
1079 cartridges at a flow rate of 1.5 mL/min and eluted at a flow rate of 0.6 mL/min. The sample  
1080 injection parameters were as follows: aspiration time, load time, and elution time were 0.6 s, 3.0  
1081 s, and 6.0 s, respectively. The RapidFire 365 system was coupled to an Ion Mobility QTOF MS  
1082 using an Agilent jet stream orthogonal electrospray ionization source maintained at the following  
1083 parameters: nitrogen sheath gas, sheath gas temperature, drying gas, drying gas temperature, and  
1084 nozzle voltage of at 8 L/min, 275°C, 3 L/min, 325°C, and 2 kV respectively. The IM-MS inlet  
1085 capillary operated at 4 kV, the high-pressure funnel operated at 4.4 Torr with RF at 100 V DC,  
1086 trapping funnel at 3.8 Torr and 100V DC, and rear funnel at 3.95 Torr and 150 V DC. The IM was  
1087 pressurized with ultrahigh purity nitrogen, and the drift potential was 1450 V. All data were  
1088 acquired in positive and negative electrospray mode with a mass range of  $m/z$  50-1700. The  
1089 Agilent ESI-L low concentration tuning mix solution (G1969-85000, Agilent Technologies) was  
1090 analyzed daily by direct infusion for single-field CCS calibration (Kurulugama *et al.*, 2015).

#### 1091 *IMS data pre-processing and feature finding*

1092 The PNNL-PreProcessor v2020.07.24 (<https://omics.pnl.gov/software/pnnl-preprocessor>)  
1093 was used to generate new raw MS files (Agilent MassHunter “.d”) for each sample run with all  
1094 frames (ion mobility separations) summed into a single frame and apply 3-points smoothing in the  
1095 ion mobility dimension and noise filtering with a minimum intensity threshold of 20 counts.  
1096 Single-frame files were converted to mzML using ProteoWizard v3.0.19228 64-bit (Kessner *et al.*,  
1097 2008). A custom R script was used to set arrival times as a substitute for retention times and  
1098 generate “LC-MS-like” mzML files. Feature detection was performed in batch mode using  
1099 MZmine 2 v2.41.2 (Pluskal *et al.*, 2010) with the steps: mzML raw data import, mass detector

1100 "Wavelet transform" (noise level 20.0, scale level 7, and wavelet window size 0.25), ADAP  
1101 chromatogram builder (min group size 3, group intensity threshold 50, min highest intensity 100,  
1102  $m/z$  tolerance 0.008 absolute and 10 ppm), chromatogram deconvolution "Local minimum search"  
1103 (chromatographic threshold 0.02, search min in RT range 0.4, min relative height 0.15, min  
1104 absolute height 200, peak duration min 0.4 and max 20), isotope grouper (monotonic shape true,  
1105 max charge 2, representative isotope lowest  $m/z$ ) and CSV data export.

1106

1107 *CCS calculation and metabolite annotation*

1108       Arrival times of detected IMS-MS features were converted to CCS using the autoCCS  
1109 Python package (<https://github.com/PNNL-Comp-Mass-Spec/AutoCCS>) which applies the  
1110 Agilent's single-field CCS method. CCS values on each run were calibrated using the closest  
1111 tuning mix infusion run as a reference and the corresponding known CCS values as reported by  
1112 the Agilent IM-MS Browser v.10.0. IMS-MS features were matched against the experimental  
1113 CCS-Compendium database (Picache *et al.*, 2019) based on tolerances of 10 ppm  $m/z$  and 1%  
1114 CCS. Plant-related compounds in the PlantCyc v15.1.0 (Schlöpfer *et al.*, 2017) were considered.

1115

1116

## 1117 **References specific to supplemental materials**

- 1118 **Arnon DI.** 1949. Copper enzymes in isolated chloroplasts: polyphenoloxidase in *Beta vulgaris*. *Plant*  
1119 *physiology* **24**, 1–15.
- 1120 **Handakumbura PP, Hixson KK, Purvine SO, Jansson C, Paša-Tolić L.** 2017. Plant iTRAQ-based  
1121 proteomics. *Current protocols in plant biology* **2**, 158–172.
- 1122 **Hiller K, Hangebrauk J, Jäger C, Spura J, Schreiber K, Schomburg D.** 2009. MetaboliteDetector:  
1123 comprehensive analysis tool for targeted and nontargeted GC/MS based metabolome analysis. *Analytical*  
1124 *chemistry* **81**, 3429–3439.
- 1125 **Kessner D, Chambers M, Burke R, Agus D, Mallick P.** 2008. ProteoWizard: open source software for  
1126 rapid proteomics tools development. *Bioinformatics* **24**, 2534–2536.
- 1127 **Kurulugama RT, Darland E, Kuhlmann F, Stafford G, Fjeldsted J.** 2015. Evaluation of drift gas  
1128 selection in complex sample analyses using a high performance drift tube ion mobility-QTOF mass  
1129 spectrometer. *Analyst* **140**, 6834–6844.
- 1130 **Müller-Moulé P, Conklin PL, Niyogi KK.** 2002. Ascorbate deficiency can limit violaxanthin de-  
1131 epoxidase activity in vivo. *Plant physiology* **128**, 970–977.
- 1132 **Picache JA, Rose BS, Balinski A, Leaptrot KL, Sherrod SD, May JC, McLean JA.** 2019. Collision  
1133 cross section compendium to annotate and predict multi-omic compound identities. *Chemical science* **10**,  
1134 983–993.
- 1135 **Queval G, Noctor G.** 2007. A plate reader method for the measurement of NAD, NADP, glutathione,  
1136 and ascorbate in tissue extracts: application to redox profiling during *Arabidopsis* rosette development.  
1137 *Analytical biochemistry* **363**, 58–69.
- 1138 **Schläpfer P, Zhang P, Wang C, et al.** 2017. Genome-wide prediction of metabolic enzymes, pathways,  
1139 and gene clusters in plants. *Plant physiology* **173**, 2041–2059.
- 1140 **Smith AM, Zeeman SC.** 2006. Quantification of starch in plant tissues. *Nature protocols* **1**, 1342–1345.
- 1141 **Stitt M, Lilley RMC, Gerhardt R, Heldt HW.** 1989. Metabolite levels in specific cells and subcellular  
1142 compartments of plant leaves. *Methods in Enzymology*. Cambridge, MA, USA: Academic Press, 518–  
1143 552.
